# Supplementary material for: The antioxidant activity of tetrahydrofuran lignans from Anogeissus rivularis: theoretical insights into the radical scavenging activity and enzyme inhibition
Source: Royal Society of Chemistry journal article supplement (doi:10.1039/d3nj03344a), 2023-01-01
Supplement: d3nj03344a1.pdf [file d3nj03344a1.pdf]

Supporting Information (SI)

---

**The antioxidant activity of tetrahydrofuran lignans from *Anogeissus rivularis*: Theoretical insights into the radical scavenging activity and enzyme inhibition**

Quan V. Vo<sup>1\*</sup>, Nguyen Thi Hoa<sup>1</sup>, Nguyen Minh Thong<sup>2</sup>, Pham Cam Nam,<sup>3</sup> Duong Tuan Quang,<sup>4</sup>  
Nguyen Khoa Hien<sup>5</sup> and Adam Mechler<sup>6</sup>

<sup>1</sup>*The University of Danang - University of Technology and Education, Da Nang 550000, Vietnam.*

<sup>2</sup>*The University of Danang - University of Science and Education, Da Nang 550000, Vietnam.*

<sup>3</sup>*Department of Chemical Engineering, The University of Danang – University of Science and Technology, Danang 550000, Vietnam.*

<sup>4</sup>*University of Education, Hue University, Hue City 530000, Vietnam.*

<sup>5</sup>*Mien Trung Institute for Scientific Research, Vietnam National Museum of Nature, Vietnam Academy of Science and Technology, Hue 530000, Vietnam.*

<sup>6</sup>*Department of Biochemistry and Chemistry, La Trobe University, Victoria 3086, Australia.*

\*Corresponding author: [vvquan@ute.udn.vn](mailto:vvquan@ute.udn.vn); [vovanquan1980@gmail.com](mailto:vovanquan1980@gmail.com)

**Table of Contents**

Table S1: The Cartesian coordinates and energies of TS of the reaction between HFL with HOO• in the studied media (G: the gas phase; P: pentyl ethanoate; W: water) .....S2

**Table S1: The Cartesian coordinates and energies of TS of the reaction between HFL with HOO\* in the studied media (G: the gas phase; P: pentyl ethanoate; W: water)**

| Name                  | 1-C2-H-OOH-G         |             |             |                                                           |
|-----------------------|----------------------|-------------|-------------|-----------------------------------------------------------|
| Cartesian Coordinates | Frequency and Energy |             |             |                                                           |
| C                     | -1.39696500          | 0.91675400  | -1.05228200 | Zero-point correction= 0.391033 (Hartree/Particle)        |
| C                     | 0.31615900           | 0.22893400  | 0.32787300  | Thermal correction to Energy= 0.415247                    |
| C                     | -0.20403100          | 1.57594000  | 0.89074700  | Thermal correction to Enthalpy= 0.416191                  |
| C                     | -0.89903400          | 2.18440600  | -0.35265300 | Thermal correction to Gibbs Free Energy= 0.335722         |
| H                     | -1.53324400          | 1.05983600  | -2.12789300 | Sum of electronic and zero-point Energies= -1188.502404   |
| H                     | -0.18513600          | -0.69602800 | 1.02944300  | Sum of electronic and thermal Energies= -1188.478191      |
| H                     | -0.98451100          | 1.35361300  | 1.62520800  | Sum of electronic and thermal Enthalpies= -1188.477246    |
| H                     | -1.71627900          | 2.84167300  | -0.05612200 | Sum of electronic and thermal Free Energies= -1188.557715 |
| O                     | -0.24310200          | 0.05187100  | -0.93805400 |                                                           |
| C                     | -2.62506900          | 0.25128000  | -0.45779000 |                                                           |
| C                     | -3.55219800          | 0.92905900  | 0.33496900  |                                                           |
| C                     | -2.89828700          | -1.09172200 | -0.77001700 |                                                           |
| C                     | -4.71380800          | 0.33023800  | 0.79794300  |                                                           |
| H                     | -3.37981100          | 1.96556000  | 0.59744100  |                                                           |
| C                     | -4.06184300          | -1.70568300 | -0.31594800 |                                                           |
| C                     | -4.96593200          | -0.99674800 | 0.46211200  |                                                           |
| H                     | -5.42530300          | 0.86787200  | 1.41041900  |                                                           |
| H                     | -4.22391200          | -2.74701300 | -0.57202900 |                                                           |
| C                     | 1.76382300           | -0.11182100 | 0.33385100  |                                                           |
| C                     | 2.49299000           | -0.23463600 | -0.84523700 |                                                           |
| C                     | 2.41316700           | -0.37190800 | 1.55090200  |                                                           |
| C                     | 3.84549900           | -0.57229800 | -0.82613600 |                                                           |
| H                     | 1.99497200           | -0.06641500 | -1.79227200 |                                                           |
| C                     | 3.75200500           | -0.70858400 | 1.58413900  |                                                           |
| H                     | 1.84808800           | -0.32937200 | 2.47652700  |                                                           |
| C                     | 4.48064900           | -0.80507100 | 0.39208100  |                                                           |
| H                     | 4.38225000           | -0.65433600 | -1.76147300 |                                                           |
| H                     | 4.26206700           | -0.91280400 | 2.51740300  |                                                           |
| O                     | -2.08240700          | -1.84347400 | -1.54677800 |                                                           |
| H                     | -1.16675600          | -1.55034400 | -1.42683000 |                                                           |
| O                     | -6.11305500          | -1.55816800 | 0.93284500  |                                                           |
| H                     | -6.15957400          | -2.47699300 | 0.65560600  |                                                           |
| O                     | 5.78716500           | -1.13977400 | 0.52547700  |                                                           |
| C                     | 6.55977700           | -1.26333100 | -0.65142900 |                                                           |
| H                     | 6.59599300           | -0.31739500 | -1.20028200 |                                                           |
| H                     | 7.56197300           | -1.53233300 | -0.32659800 |                                                           |
| H                     | 6.16421600           | -2.04909500 | -1.30215000 |                                                           |
| C                     | 0.84573500           | 2.46520600  | 1.54734500  |                                                           |
| H                     | 1.21819100           | 2.01990800  | 2.47108400  |                                                           |
| H                     | 1.70201000           | 2.63055100  | 0.89107400  |                                                           |
| H                     | 0.40697900           | 3.43415900  | 1.79889400  |                                                           |
| C                     | 0.05887300           | 2.95449900  | -1.26081800 |                                                           |
| H                     | 0.44579900           | 3.84506100  | -0.76328800 |                                                           |
| H                     | 0.90951000           | 2.33142800  | -1.55042200 |                                                           |
| H                     | -0.45486900          | 3.27423100  | -2.17007900 |                                                           |
| H                     | 0.98830800           | -2.80020000 | 0.76536300  |                                                           |
| O                     | -0.49169800          | -1.87254000 | 1.42728100  |                                                           |
| O                     | 0.07823500           | -2.66769700 | 0.46002600  |                                                           |
| Name                  | 1-C2-H-OOH-P         |             |             |                                                           |
| Cartesian Coordinates | Frequency and Energy |             |             |                                                           |

|                              |             |             |             |                                              |                             |
|------------------------------|-------------|-------------|-------------|----------------------------------------------|-----------------------------|
| C                            | -1.39178400 | 0.91743800  | -1.05477700 | Zero-point correction=                       | 0.390562 (Hartree/Particle) |
| C                            | 0.31644900  | 0.20088600  | 0.33773500  | Thermal correction to Energy=                | 0.414702                    |
| C                            | -0.21691000 | 1.53804800  | 0.91289300  | Thermal correction to Enthalpy=              | 0.415646                    |
| C                            | -0.89192000 | 2.16759100  | -0.32972400 | Thermal correction to Gibbs Free Energy=     | 0.335332                    |
| H                            | -1.50094600 | 1.08057200  | -2.13066300 | Sum of electronic and zero-point Energies=   | -1188.533530                |
| H                            | -0.15262800 | -0.71005500 | 1.05972200  | Sum of electronic and thermal Energies=      | -1188.509390                |
| H                            | -1.00939600 | 1.30074600  | 1.62960400  | Sum of electronic and thermal Enthalpies=    | -1188.508446                |
| H                            | -1.70730500 | 2.82595600  | -0.03139000 | Sum of electronic and thermal Free Energies= | -1188.588760                |
| O                            | -0.25843900 | 0.02398400  | -0.92527000 |                                              |                             |
| C                            | -2.64596100 | 0.25915700  | -0.50363000 |                                              |                             |
| C                            | -3.59782200 | 0.94409600  | 0.25266600  |                                              |                             |
| C                            | -2.91576700 | -1.08447300 | -0.81868400 |                                              |                             |
| C                            | -4.77764700 | 0.34964200  | 0.67826100  |                                              |                             |
| H                            | -3.42981000 | 1.98138700  | 0.51490700  |                                              |                             |
| C                            | -4.09461500 | -1.69673100 | -0.40119100 |                                              |                             |
| C                            | -5.02285300 | -0.97920500 | 0.34246000  |                                              |                             |
| H                            | -5.50571400 | 0.89807300  | 1.26259000  |                                              |                             |
| H                            | -4.26164900 | -2.73787700 | -0.65710900 |                                              |                             |
| C                            | 1.76933000  | -0.11956600 | 0.32499200  |                                              |                             |
| C                            | 2.48295400  | -0.26117400 | -0.86277900 |                                              |                             |
| C                            | 2.44245600  | -0.34146100 | 1.53792400  |                                              |                             |
| C                            | 3.83849800  | -0.58660100 | -0.85821500 |                                              |                             |
| H                            | 1.97612700  | -0.11263200 | -1.80864500 |                                              |                             |
| C                            | 3.78491600  | -0.66718200 | 1.55689400  |                                              |                             |
| H                            | 1.89849600  | -0.26928300 | 2.47455400  |                                              |                             |
| C                            | 4.49545400  | -0.78886100 | 0.35501600  |                                              |                             |
| H                            | 4.36265200  | -0.68241500 | -1.79979300 |                                              |                             |
| H                            | 4.30715800  | -0.83993200 | 2.49065800  |                                              |                             |
| O                            | -2.06953300 | -1.84060600 | -1.56029200 |                                              |                             |
| H                            | -1.17489800 | -1.47471100 | -1.47593100 |                                              |                             |
| O                            | -6.18563200 | -1.53592200 | 0.77404000  |                                              |                             |
| H                            | -6.22823100 | -2.45769900 | 0.49512600  |                                              |                             |
| O                            | 5.80428300  | -1.11133600 | 0.47071600  |                                              |                             |
| C                            | 6.55581300  | -1.26160000 | -0.72398300 |                                              |                             |
| H                            | 6.57812600  | -0.32922600 | -1.29553200 |                                              |                             |
| H                            | 7.56619600  | -1.51901200 | -0.41295300 |                                              |                             |
| H                            | 6.15110400  | -2.06578200 | -1.34523400 |                                              |                             |
| C                            | 0.81138400  | 2.42283200  | 1.60592900  |                                              |                             |
| H                            | 1.16319800  | 1.96742200  | 2.53320600  |                                              |                             |
| H                            | 1.68044300  | 2.61072900  | 0.97252300  |                                              |                             |
| H                            | 0.35572600  | 3.38319500  | 1.86184200  |                                              |                             |
| C                            | 0.08079700  | 2.94216800  | -1.21672900 |                                              |                             |
| H                            | 0.46468300  | 3.82548300  | -0.70342900 |                                              |                             |
| H                            | 0.93383600  | 2.32140400  | -1.50645000 |                                              |                             |
| H                            | -0.42251900 | 3.27624100  | -2.12723900 |                                              |                             |
| H                            | 1.17632200  | -2.73829900 | 1.28607700  |                                              |                             |
| O                            | -0.41955800 | -1.83595100 | 1.65240400  |                                              |                             |
| O                            | 0.28274500  | -2.75315800 | 0.90637800  |                                              |                             |
| <b>Name</b>                  |             |             |             | <b>1-C2-H-OOH-W</b>                          |                             |
| <b>Cartesian Coordinates</b> |             |             |             | <b>Frequency and Energy</b>                  |                             |
| C                            | -1.38931300 | 0.91533100  | -1.08326000 | Zero-point correction=                       | 0.390033 (Hartree/Particle) |
| C                            | 0.31303600  | 0.17456800  | 0.29935300  | Thermal correction to Energy=                | 0.414009                    |
| C                            | -0.19953200 | 1.51810000  | 0.88000100  | Thermal correction to Enthalpy=              | 0.414953                    |
| C                            | -0.87503800 | 2.15846300  | -0.35590300 | Thermal correction to Gibbs Free Energy=     | 0.335453                    |

|                              |             |             |             |                                              |                             |
|------------------------------|-------------|-------------|-------------|----------------------------------------------|-----------------------------|
| H                            | -1.51887100 | 1.08335900  | -2.15507100 | Sum of electronic and zero-point Energies=   | -1188.536597                |
| H                            | -0.18766400 | -0.70552000 | 0.99691900  | Sum of electronic and thermal Energies=      | -1188.512621                |
| H                            | -0.98753100 | 1.28909100  | 1.60379900  | Sum of electronic and thermal Enthalpies=    | -1188.511677                |
| H                            | -1.68208300 | 2.82214900  | -0.04945100 | Sum of electronic and thermal Free Energies= | -1188.591177                |
| O                            | -0.25509000 | 0.01933900  | -0.97323000 |                                              |                             |
| C                            | -2.63539700 | 0.26006700  | -0.50438000 |                                              |                             |
| C                            | -3.59999100 | 0.98134100  | 0.20244700  |                                              |                             |
| C                            | -2.89218500 | -1.10335300 | -0.72672600 |                                              |                             |
| C                            | -4.77214000 | 0.40048200  | 0.66758200  |                                              |                             |
| H                            | -3.44777500 | 2.03629500  | 0.39243200  |                                              |                             |
| C                            | -4.05897600 | -1.70704300 | -0.26630000 |                                              |                             |
| C                            | -4.99657900 | -0.95116600 | 0.42467200  |                                              |                             |
| H                            | -5.50843900 | 0.97993000  | 1.21048400  |                                              |                             |
| H                            | -4.22149300 | -2.76376200 | -0.44939000 |                                              |                             |
| C                            | 1.76260900  | -0.16058700 | 0.29570100  |                                              |                             |
| C                            | 2.50545800  | -0.21220400 | -0.88193900 |                                              |                             |
| C                            | 2.40709300  | -0.44605100 | 1.50954500  |                                              |                             |
| C                            | 3.86560600  | -0.51711400 | -0.86407900 |                                              |                             |
| H                            | 2.02545100  | 0.00012300  | -1.82956100 |                                              |                             |
| C                            | 3.75437400  | -0.75086900 | 1.54189300  |                                              |                             |
| H                            | 1.83688800  | -0.43643000 | 2.43305900  |                                              |                             |
| C                            | 4.49162900  | -0.78468100 | 0.35194700  |                                              |                             |
| H                            | 4.41665800  | -0.54045900 | -1.79458000 |                                              |                             |
| H                            | 4.25636200  | -0.97394200 | 2.47606900  |                                              |                             |
| O                            | -2.02818500 | -1.91136800 | -1.41593300 |                                              |                             |
| H                            | -1.15355100 | -1.48560300 | -1.43253000 |                                              |                             |
| O                            | -6.16050000 | -1.49964000 | 0.89490900  |                                              |                             |
| H                            | -6.20285400 | -2.43394600 | 0.65532200  |                                              |                             |
| O                            | 5.81279600  | -1.09390600 | 0.47824700  |                                              |                             |
| C                            | 6.59292500  | -1.14913700 | -0.71283500 |                                              |                             |
| H                            | 6.60315700  | -0.17896000 | -1.21511100 |                                              |                             |
| H                            | 7.60082900  | -1.40890100 | -0.39762100 |                                              |                             |
| H                            | 6.21072600  | -1.91517800 | -1.39170200 |                                              |                             |
| C                            | 0.85149200  | 2.38058600  | 1.56520900  |                                              |                             |
| H                            | 1.21414600  | 1.90388500  | 2.47760100  |                                              |                             |
| H                            | 1.70895800  | 2.56654100  | 0.91538600  |                                              |                             |
| H                            | 0.41141800  | 3.34232200  | 1.84069300  |                                              |                             |
| C                            | 0.09896000  | 2.92767400  | -1.24543400 |                                              |                             |
| H                            | 0.48555400  | 3.80850000  | -0.73031700 |                                              |                             |
| H                            | 0.94958400  | 2.30397600  | -1.53610300 |                                              |                             |
| H                            | -0.40707400 | 3.26182900  | -2.15403200 |                                              |                             |
| H                            | 0.92467200  | -2.90524100 | 1.36275600  |                                              |                             |
| O                            | -0.61237600 | -1.84840600 | 1.55438500  |                                              |                             |
| O                            | 0.08986200  | -2.81418000 | 0.87455300  |                                              |                             |
| <b>Name</b>                  |             |             |             | <b>1-C5-H-OOH-G</b>                          |                             |
| <b>Cartesian Coordinates</b> |             |             |             | <b>Frequency and Energy</b>                  |                             |
| C                            | -1.18637600 | 0.40501100  | -0.10194400 | Zero-point correction=                       | 0.391567 (Hartree/Particle) |
| C                            | 0.51550600  | -0.20620100 | 1.39119100  | Thermal correction to Energy=                | 0.415637                    |
| C                            | -0.00419400 | 1.17972400  | 1.83434300  | Thermal correction to Enthalpy=              | 0.416581                    |
| C                            | -0.74391600 | 1.71004500  | 0.58475700  | Thermal correction to Gibbs Free Energy=     | 0.336773                    |
| H                            | -0.77391200 | 0.48275700  | -1.28788800 | Sum of electronic and zero-point Energies=   | -1188.504835                |
| H                            | 0.51920100  | -0.89310700 | 2.24206200  | Sum of electronic and thermal Energies=      | -1188.480766                |
| H                            | -0.77168800 | 0.97116500  | 2.58695800  | Sum of electronic and thermal Enthalpies=    | -1188.479822                |
| H                            | -1.63061000 | 2.26182700  | 0.90630400  | Sum of electronic and thermal Free Energies= | -1188.559629                |

|                              |             |             |             |                                                           |
|------------------------------|-------------|-------------|-------------|-----------------------------------------------------------|
| O                            | -0.51600700 | -0.66928000 | 0.51125400  |                                                           |
| C                            | -2.62995400 | 0.14668200  | -0.33037200 |                                                           |
| C                            | -3.41209400 | 1.19820500  | -0.83790000 |                                                           |
| C                            | -3.23968900 | -1.11930300 | -0.21095300 |                                                           |
| C                            | -4.74005200 | 1.04202900  | -1.18160300 |                                                           |
| H                            | -2.94567100 | 2.16855400  | -0.97521400 |                                                           |
| C                            | -4.58746000 | -1.28186600 | -0.54117600 |                                                           |
| C                            | -5.32995100 | -0.21580300 | -1.02172100 |                                                           |
| H                            | -5.33283700 | 1.86210100  | -1.56420100 |                                                           |
| H                            | -5.02265400 | -2.26816900 | -0.42175600 |                                                           |
| C                            | 1.87822400  | -0.25498800 | 0.73452000  |                                                           |
| C                            | 2.04281400  | -0.37008200 | -0.63901200 |                                                           |
| C                            | 3.02280700  | -0.20324100 | 1.53900000  |                                                           |
| C                            | 3.31453000  | -0.39893100 | -1.21361200 |                                                           |
| H                            | 1.18064400  | -0.44515400 | -1.29092000 |                                                           |
| C                            | 4.28890200  | -0.22826800 | 0.98577200  |                                                           |
| H                            | 2.92025900  | -0.14932800 | 2.61843800  |                                                           |
| C                            | 4.44207800  | -0.31999200 | -0.40130000 |                                                           |
| H                            | 3.40008200  | -0.48899200 | -2.28792900 |                                                           |
| H                            | 5.17821500  | -0.18978900 | 1.60259100  |                                                           |
| O                            | -2.60228600 | -2.22361300 | 0.21644300  |                                                           |
| H                            | -1.67661500 | -1.99984900 | 0.40261300  |                                                           |
| O                            | -6.63937400 | -0.33495400 | -1.36074500 |                                                           |
| H                            | -6.93539900 | -1.23716100 | -1.21130500 |                                                           |
| O                            | 5.72125600  | -0.33728100 | -0.85599100 |                                                           |
| C                            | 5.91919900  | -0.44046600 | -2.25090300 |                                                           |
| H                            | 5.47078900  | 0.40776500  | -2.77721300 |                                                           |
| H                            | 6.99590000  | -0.43390600 | -2.40382600 |                                                           |
| H                            | 5.50122600  | -1.37339900 | -2.64128500 |                                                           |
| C                            | 1.02284700  | 2.12631200  | 2.43688500  |                                                           |
| H                            | 1.45583800  | 1.70460300  | 3.34692800  |                                                           |
| H                            | 1.83773100  | 2.33385100  | 1.74182600  |                                                           |
| H                            | 0.54817400  | 3.07309300  | 2.70501300  |                                                           |
| C                            | 0.08925100  | 2.61269900  | -0.32919400 |                                                           |
| H                            | 0.35264100  | 3.54132100  | 0.18062900  |                                                           |
| H                            | 1.01137600  | 2.12165900  | -0.64745600 |                                                           |
| H                            | -0.47717000 | 2.86476200  | -1.22860300 |                                                           |
| H                            | -2.34140800 | -0.11740400 | -3.06424500 |                                                           |
| O                            | -0.64486000 | 0.49485600  | -2.58419200 |                                                           |
| O                            | -1.46829100 | -0.53027600 | -2.97960500 |                                                           |
| <b>Name</b>                  |             |             |             | <b>1-C5-H-OOH-P</b>                                       |
| <b>Cartesian Coordinates</b> |             |             |             | <b>Frequency and Energy</b>                               |
| C                            | -1.19077400 | 0.42392600  | -0.15328400 | Zero-point correction= 0.390733 (Hartree/Particle)        |
| C                            | 0.51057700  | -0.20644500 | 1.34361400  | Thermal correction to Energy= 0.414848                    |
| C                            | -0.01588700 | 1.17244300  | 1.79675700  | Thermal correction to Enthalpy= 0.415792                  |
| C                            | -0.74659800 | 1.72009400  | 0.54906700  | Thermal correction to Gibbs Free Energy= 0.335793         |
| H                            | -0.80000200 | 0.50877200  | -1.33778900 | Sum of electronic and zero-point Energies= -1188.535022   |
| H                            | 0.49482800  | -0.90506900 | 2.18407600  | Sum of electronic and thermal Energies= -1188.510907      |
| H                            | -0.78847200 | 0.95398900  | 2.54072000  | Sum of electronic and thermal Enthalpies= -1188.509963    |
| H                            | -1.63275900 | 2.27106400  | 0.87100900  | Sum of electronic and thermal Free Energies= -1188.589962 |
| O                            | -0.50287100 | -0.65673600 | 0.42960000  |                                                           |
| C                            | -2.64000100 | 0.15771300  | -0.35073900 |                                                           |
| C                            | -3.44084800 | 1.20654900  | -0.83399900 |                                                           |
| C                            | -3.24254500 | -1.10996800 | -0.21058400 |                                                           |

|                       |             |             |             |                                                           |
|-----------------------|-------------|-------------|-------------|-----------------------------------------------------------|
| C                     | -4.77879800 | 1.04400800  | -1.13508700 |                                                           |
| H                     | -2.98492100 | 2.18048400  | -0.98249800 |                                                           |
| C                     | -4.59831900 | -1.28129900 | -0.49881200 |                                                           |
| C                     | -5.35879800 | -0.21648900 | -0.95751400 |                                                           |
| H                     | -5.38238700 | 1.86521400  | -1.50027700 |                                                           |
| H                     | -5.03462400 | -2.26586000 | -0.36561100 |                                                           |
| C                     | 1.88529500  | -0.25454500 | 0.71245200  |                                                           |
| C                     | 2.07748700  | -0.33849000 | -0.66032100 |                                                           |
| C                     | 3.01468300  | -0.23371400 | 1.54014300  |                                                           |
| C                     | 3.35929800  | -0.37414700 | -1.21317100 |                                                           |
| H                     | 1.22516100  | -0.38443500 | -1.32842500 |                                                           |
| C                     | 4.29164600  | -0.26430700 | 1.00956200  |                                                           |
| H                     | 2.89095000  | -0.19946300 | 2.61812200  |                                                           |
| C                     | 4.47236500  | -0.33021100 | -0.37668600 |                                                           |
| H                     | 3.46727900  | -0.44152500 | -2.28761900 |                                                           |
| H                     | 5.16606000  | -0.24999300 | 1.64975500  |                                                           |
| O                     | -2.58097100 | -2.20791500 | 0.20352800  |                                                           |
| H                     | -1.65632100 | -1.96123600 | 0.37634500  |                                                           |
| O                     | -6.67572300 | -0.34357400 | -1.25388800 |                                                           |
| H                     | -6.96253500 | -1.25078800 | -1.09604700 |                                                           |
| O                     | 5.75769400  | -0.35865900 | -0.80901000 |                                                           |
| C                     | 5.97811700  | -0.44495100 | -2.20733900 |                                                           |
| H                     | 5.55741800  | 0.42037200  | -2.72794200 |                                                           |
| H                     | 7.05797000  | -0.45718600 | -2.34213200 |                                                           |
| H                     | 5.55086400  | -1.36430100 | -2.61842400 |                                                           |
| C                     | 1.00553000  | 2.10973600  | 2.42072600  |                                                           |
| H                     | 1.43673600  | 1.66800500  | 3.32247500  |                                                           |
| H                     | 1.82176500  | 2.34020300  | 1.73378200  |                                                           |
| H                     | 0.52476700  | 3.04782600  | 2.70938600  |                                                           |
| C                     | 0.09069800  | 2.63344900  | -0.34791600 |                                                           |
| H                     | 0.36040700  | 3.54933700  | 0.18198000  |                                                           |
| H                     | 1.01124300  | 2.14804400  | -0.68001900 |                                                           |
| H                     | -0.47969900 | 2.91541700  | -1.23634800 |                                                           |
| H                     | -2.37384200 | -0.16639200 | -3.08744100 |                                                           |
| O                     | -0.67211400 | 0.47572200  | -2.65392000 |                                                           |
| O                     | -1.49200500 | -0.56645300 | -3.01479100 |                                                           |
| <b>Name</b>           |             |             |             | <b>1-C5-H-OOH-W</b>                                       |
| Cartesian Coordinates |             |             |             | Frequency and Energy                                      |
| C                     | -1.19255400 | 0.40522900  | -0.19192300 | Zero-point correction= 0.390143 (Hartree/Particle)        |
| C                     | 0.50936400  | -0.23306300 | 1.30493000  | Thermal correction to Energy= 0.414167                    |
| C                     | -0.01290600 | 1.14688900  | 1.75595100  | Thermal correction to Enthalpy= 0.415111                  |
| C                     | -0.74154700 | 1.69915100  | 0.51027800  | Thermal correction to Gibbs Free Energy= 0.335457         |
| H                     | -0.82616300 | 0.49230400  | -1.36423000 | Sum of electronic and zero-point Energies= -1188.536003   |
| H                     | 0.47930800  | -0.93394200 | 2.14187300  | Sum of electronic and thermal Energies= -1188.511979      |
| H                     | -0.78488500 | 0.93241700  | 2.50063600  | Sum of electronic and thermal Enthalpies= -1188.511035    |
| H                     | -1.62556900 | 2.25255800  | 0.83205600  | Sum of electronic and thermal Free Energies= -1188.590689 |
| O                     | -0.48990000 | -0.67887800 | 0.36980700  |                                                           |
| C                     | -2.64654700 | 0.14558600  | -0.36051600 |                                                           |
| C                     | -3.43378800 | 1.18732200  | -0.88217700 |                                                           |
| C                     | -3.27333800 | -1.09633600 | -0.14574300 |                                                           |
| C                     | -4.77789800 | 1.03435900  | -1.15782600 |                                                           |
| H                     | -2.95907400 | 2.14279800  | -1.08307400 |                                                           |
| C                     | -4.63245400 | -1.26215700 | -0.41032200 |                                                           |
| C                     | -5.37632500 | -0.20572800 | -0.91300000 |                                                           |

|                              |             |             |             |                                                           |
|------------------------------|-------------|-------------|-------------|-----------------------------------------------------------|
| H                            | -5.37079900 | 1.84853200  | -1.55512100 |                                                           |
| H                            | -5.09528900 | -2.22473400 | -0.22071500 |                                                           |
| C                            | 1.89351800  | -0.28046500 | 0.69662700  |                                                           |
| C                            | 2.11313700  | -0.31353900 | -0.67467800 |                                                           |
| C                            | 3.00459200  | -0.29933600 | 1.54843000  |                                                           |
| C                            | 3.40544700  | -0.34021300 | -1.20373500 |                                                           |
| H                            | 1.27299900  | -0.32219900 | -1.35964300 |                                                           |
| C                            | 4.29271300  | -0.31999700 | 1.04232300  |                                                           |
| H                            | 2.85559500  | -0.30091100 | 2.62355300  |                                                           |
| C                            | 4.49771400  | -0.33544300 | -0.34079400 |                                                           |
| H                            | 3.53904100  | -0.36692500 | -2.27690500 |                                                           |
| H                            | 5.15326200  | -0.33364300 | 1.70120000  |                                                           |
| O                            | -2.62022800 | -2.19067800 | 0.33499200  |                                                           |
| H                            | -1.69332400 | -1.94309500 | 0.50628300  |                                                           |
| O                            | -6.70815300 | -0.32591300 | -1.18686600 |                                                           |
| H                            | -7.01157600 | -1.21814100 | -0.97489800 |                                                           |
| O                            | 5.80057900  | -0.35608200 | -0.75391000 |                                                           |
| C                            | 6.04089100  | -0.36905600 | -2.15705500 |                                                           |
| H                            | 5.62452300  | 0.52315100  | -2.63114800 |                                                           |
| H                            | 7.12208100  | -0.37539000 | -2.27575500 |                                                           |
| H                            | 5.61595400  | -1.26474200 | -2.61668300 |                                                           |
| C                            | 1.01601300  | 2.07747400  | 2.37664100  |                                                           |
| H                            | 1.45647400  | 1.62460200  | 3.26803700  |                                                           |
| H                            | 1.82401400  | 2.31205700  | 1.68108100  |                                                           |
| H                            | 0.53884900  | 3.01380900  | 2.67540800  |                                                           |
| C                            | 0.09223300  | 2.61100800  | -0.38999500 |                                                           |
| H                            | 0.37537100  | 3.51985000  | 0.14438900  |                                                           |
| H                            | 1.00354400  | 2.11937200  | -0.73781400 |                                                           |
| H                            | -0.49292900 | 2.90307600  | -1.26549700 |                                                           |
| H                            | -2.46332000 | -0.04849200 | -3.15814800 |                                                           |
| O                            | -0.70554500 | 0.44412500  | -2.72060200 |                                                           |
| O                            | -1.61608000 | -0.51835600 | -3.08025600 |                                                           |
| <b>Name</b>                  |             |             |             | <b>1-O9-H-OOH-G</b>                                       |
| <b>Cartesian Coordinates</b> |             |             |             | <b>Frequency and Energy</b>                               |
| C                            | -1.32934900 | 1.02960800  | -0.99645300 | Zero-point correction= 0.391242 (Hartree/Particle)        |
| C                            | 0.27133700  | 0.03050000  | 0.38143300  | Thermal correction to Energy= 0.415079                    |
| C                            | -0.10362300 | 1.41715900  | 1.00030900  | Thermal correction to Enthalpy= 0.416023                  |
| C                            | -0.71680000 | 2.18488500  | -0.19092600 | Thermal correction to Gibbs Free Energy= 0.334382         |
| H                            | -1.43432800 | 1.28464500  | -2.05609000 | Sum of electronic and zero-point Energies= -1188.500289   |
| H                            | -0.21578500 | -0.75955200 | 0.96697500  | Sum of electronic and thermal Energies= -1188.476452      |
| H                            | -0.91417700 | 1.23635300  | 1.71230900  | Sum of electronic and thermal Enthalpies= -1188.475507    |
| H                            | -1.47777400 | 2.87690400  | 0.17040200  | Sum of electronic and thermal Free Energies= -1188.557148 |
| O                            | -0.30662100 | 0.03022200  | -0.93466700 |                                                           |
| C                            | -2.66174700 | 0.51263400  | -0.46697300 |                                                           |
| C                            | -3.65794500 | 1.42796100  | -0.07720100 |                                                           |
| C                            | -2.97083700 | -0.86287100 | -0.42027000 |                                                           |
| C                            | -4.89295300 | 1.02690500  | 0.37588400  |                                                           |
| H                            | -3.45267400 | 2.48910200  | -0.15163500 |                                                           |
| C                            | -4.20134800 | -1.28626200 | 0.06921800  |                                                           |
| C                            | -5.17477600 | -0.35667600 | 0.48320900  |                                                           |
| H                            | -5.65464600 | 1.73479400  | 0.67590100  |                                                           |
| H                            | -4.41424400 | -2.34667200 | 0.11757500  |                                                           |
| C                            | 1.74106700  | -0.29284800 | 0.28108700  |                                                           |
| C                            | 2.46315500  | -0.12308100 | -0.89115400 |                                                           |

|                              |             |             |             |                                                           |
|------------------------------|-------------|-------------|-------------|-----------------------------------------------------------|
| C                            | 2.41343200  | -0.76641000 | 1.41304500  |                                                           |
| C                            | 3.83205000  | -0.39092200 | -0.94369000 |                                                           |
| H                            | 1.95051700  | 0.20249600  | -1.78789900 |                                                           |
| C                            | 3.76967700  | -1.02896500 | 1.38158200  |                                                           |
| H                            | 1.86174000  | -0.93594900 | 2.33285500  |                                                           |
| C                            | 4.49089300  | -0.83660000 | 0.19899100  |                                                           |
| H                            | 4.36087200  | -0.25517600 | -1.87734300 |                                                           |
| H                            | 4.29681800  | -1.39603100 | 2.25345300  |                                                           |
| O                            | -2.12971200 | -1.83437400 | -0.84094300 |                                                           |
| H                            | -1.28330800 | -1.42694700 | -1.09079000 |                                                           |
| O                            | -6.32279700 | -0.74842700 | 0.97821300  |                                                           |
| H                            | -6.89484000 | -1.40530600 | 0.23281000  |                                                           |
| O                            | 5.81673100  | -1.12196700 | 0.26115900  |                                                           |
| C                            | 6.58000500  | -0.95504200 | -0.91508500 |                                                           |
| H                            | 6.55797800  | 0.08471800  | -1.25619400 |                                                           |
| H                            | 7.59970800  | -1.22874200 | -0.65454100 |                                                           |
| H                            | 6.22070800  | -1.60927300 | -1.71551100 |                                                           |
| C                            | 1.01937900  | 2.14785200  | 1.72555500  |                                                           |
| H                            | 1.34949000  | 1.58777700  | 2.60240100  |                                                           |
| H                            | 1.88962500  | 2.29182500  | 1.08272900  |                                                           |
| H                            | 0.67054400  | 3.12627200  | 2.06544100  |                                                           |
| C                            | 0.30108900  | 2.95441000  | -1.03066000 |                                                           |
| H                            | 0.76148800  | 3.75625400  | -0.45142600 |                                                           |
| H                            | 1.09755800  | 2.29714400  | -1.38557400 |                                                           |
| H                            | -0.18450000 | 3.40511400  | -1.89934600 |                                                           |
| H                            | -6.63714200 | -1.11266800 | -2.29206700 |                                                           |
| O                            | -7.41751200 | -1.84289000 | -0.77304100 |                                                           |
| O                            | -6.40547600 | -1.83390200 | -1.68879600 |                                                           |
| <b>Name</b>                  |             |             |             | <b>1-O9-H-OOH-P</b>                                       |
| <b>Cartesian Coordinates</b> |             |             |             | <b>Frequency and Energy</b>                               |
| C                            | -1.34121800 | 0.81355800  | -1.02566300 | Zero-point correction= 0.390752 (Hartree/Particle)        |
| C                            | 0.30664700  | -0.03786900 | 0.39936300  | Thermal correction to Energy= 0.414368                    |
| C                            | -0.12347300 | 1.36584800  | 0.93876600  | Thermal correction to Enthalpy= 0.415312                  |
| C                            | -0.78541000 | 2.03591600  | -0.28580700 | Thermal correction to Gibbs Free Energy= 0.335588         |
| H                            | -1.46635900 | 1.00597400  | -2.09626100 | Sum of electronic and zero-point Energies= -1188.532210   |
| H                            | -0.15049200 | -0.81075800 | 1.02871700  | Sum of electronic and thermal Energies= -1188.508594      |
| H                            | -0.91381800 | 1.19052700  | 1.67405600  | Sum of electronic and thermal Enthalpies= -1188.507649    |
| H                            | -1.57389000 | 2.71219400  | 0.04251100  | Sum of electronic and thermal Free Energies= -1188.587374 |
| O                            | -0.26749100 | -0.13214400 | -0.91756100 |                                                           |
| C                            | -2.64002900 | 0.23202600  | -0.47747000 |                                                           |
| C                            | -3.64670900 | 1.06156400  | 0.02950100  |                                                           |
| C                            | -2.89697800 | -1.16489000 | -0.54688200 |                                                           |
| C                            | -4.85119900 | 0.55815200  | 0.48346800  |                                                           |
| H                            | -3.48870000 | 2.13180600  | 0.06590600  |                                                           |
| C                            | -4.10159900 | -1.68238100 | -0.10304100 |                                                           |
| C                            | -5.09066100 | -0.83746500 | 0.42880700  |                                                           |
| H                            | -5.61505100 | 1.20715400  | 0.89782200  |                                                           |
| H                            | -4.28528100 | -2.74820100 | -0.16437300 |                                                           |
| C                            | 1.78737700  | -0.31311300 | 0.31770200  |                                                           |
| C                            | 2.51622100  | -0.14954000 | -0.85269700 |                                                           |
| C                            | 2.46564700  | -0.72648600 | 1.46993300  |                                                           |
| C                            | 3.89452500  | -0.37005400 | -0.88626200 |                                                           |
| H                            | 2.00672400  | 0.13979300  | -1.76390200 |                                                           |
| C                            | 3.83198400  | -0.94200200 | 1.45722900  |                                                           |



|                              |             |             |             |                                                           |
|------------------------------|-------------|-------------|-------------|-----------------------------------------------------------|
| H                            | 1.91185100  | -0.88373700 | 2.39075200  |                                                           |
| C                            | 4.55836800  | -0.76026400 | 0.27510000  |                                                           |
| H                            | 4.42806600  | -0.23949000 | -1.81837300 |                                                           |
| H                            | 4.35851500  | -1.26207100 | 2.34878500  |                                                           |
| O                            | -2.01039900 | -2.03761600 | -1.06854000 |                                                           |
| H                            | -1.15967100 | -1.57274100 | -1.18739900 |                                                           |
| O                            | -6.21860800 | -1.33884100 | 0.88351800  |                                                           |
| H                            | -7.05807000 | -1.03371000 | 0.19313000  |                                                           |
| O                            | 5.89184900  | -0.99655100 | 0.35294200  |                                                           |
| C                            | 6.65928700  | -0.82799800 | -0.82742500 |                                                           |
| H                            | 6.60270400  | 0.20219100  | -1.19159000 |                                                           |
| H                            | 7.68729400  | -1.05782800 | -0.55417900 |                                                           |
| H                            | 6.33144400  | -1.51434900 | -1.61373900 |                                                           |
| C                            | 0.97363800  | 2.18543800  | 1.60472600  |                                                           |
| H                            | 1.34080500  | 1.68752300  | 2.50487300  |                                                           |
| H                            | 1.82640500  | 2.34209900  | 0.94105700  |                                                           |
| H                            | 0.58219600  | 3.16246700  | 1.90074800  |                                                           |
| C                            | 0.18223400  | 2.80837000  | -1.17959300 |                                                           |
| H                            | 0.60933100  | 3.66108300  | -0.64875000 |                                                           |
| H                            | 1.00591000  | 2.17610300  | -1.51863900 |                                                           |
| H                            | -0.33982200 | 3.19040900  | -2.06040900 |                                                           |
| H                            | -6.69797900 | 0.75617900  | -1.45383700 |                                                           |
| O                            | -7.75010200 | -0.62190900 | -0.75733000 |                                                           |
| O                            | -6.82506700 | -0.18638300 | -1.65542500 |                                                           |
| <b>Name</b>                  |             |             |             | <b>1-O9-H-OOH-W</b>                                       |
| <b>Cartesian Coordinates</b> |             |             |             | <b>Frequency and Energy</b>                               |
| C                            | -0.71811500 | 0.85378000  | -0.88206800 | Zero-point correction= 0.389618 (Hartree/Particle)        |
| C                            | 0.98907800  | -0.03217900 | 0.45067600  | Thermal correction to Energy= 0.413287                    |
| C                            | 0.58800100  | 1.35944300  | 1.03694200  | Thermal correction to Enthalpy= 0.414231                  |
| C                            | -0.12648400 | 2.05756700  | -0.14038000 | Thermal correction to Gibbs Free Energy= 0.334230         |
| H                            | -0.89366500 | 1.07030800  | -1.94004100 | Sum of electronic and zero-point Energies= -1188.531853   |
| H                            | 0.55805000  | -0.81805300 | 1.08095600  | Sum of electronic and thermal Energies= -1188.508184      |
| H                            | -0.16794500 | 1.16972600  | 1.80365400  | Sum of electronic and thermal Enthalpies= -1188.507240    |
| H                            | -0.89958700 | 2.72390100  | 0.23918300  | Sum of electronic and thermal Free Energies= -1188.587242 |
| O                            | 0.35341300  | -0.10115600 | -0.84164600 |                                                           |
| C                            | -1.99818800 | 0.27737400  | -0.28829800 |                                                           |
| C                            | -2.98824900 | 1.12182900  | 0.22099500  |                                                           |
| C                            | -2.26599100 | -1.12061200 | -0.31544300 |                                                           |
| C                            | -4.18338400 | 0.63275900  | 0.71726000  |                                                           |
| H                            | -2.82962800 | 2.19229800  | 0.22157500  |                                                           |
| C                            | -3.45615300 | -1.62625800 | 0.17175400  |                                                           |
| C                            | -4.42414900 | -0.76159200 | 0.70486300  |                                                           |
| H                            | -4.94136700 | 1.29425500  | 1.12083300  |                                                           |
| H                            | -3.64236000 | -2.69317000 | 0.14420700  |                                                           |
| C                            | 2.46480400  | -0.30456000 | 0.30237100  |                                                           |
| C                            | 3.15860100  | -0.08555600 | -0.88132900 |                                                           |
| C                            | 3.17802300  | -0.76451500 | 1.41512700  |                                                           |
| C                            | 4.53560200  | -0.30196000 | -0.96705000 |                                                           |
| H                            | 2.62943600  | 0.25229200  | -1.76395600 |                                                           |
| C                            | 4.54473700  | -0.97577500 | 1.35165700  |                                                           |
| H                            | 2.65190300  | -0.95744100 | 2.34501000  |                                                           |
| C                            | 5.23094300  | -0.74081800 | 0.15653200  |                                                           |
| H                            | 5.04173000  | -0.12587200 | -1.90678800 |                                                           |
| H                            | 5.09756700  | -1.32994800 | 2.21408200  |                                                           |

|                       |             |             |             |                                                           |
|-----------------------|-------------|-------------|-------------|-----------------------------------------------------------|
| O                     | -1.38881000 | -2.01557400 | -0.84300900 |                                                           |
| H                     | -0.54665300 | -1.54875600 | -1.02104200 |                                                           |
| O                     | -5.55290700 | -1.25121200 | 1.20226700  |                                                           |
| H                     | -6.39733400 | -0.93345600 | 0.55600600  |                                                           |
| O                     | 6.57756400  | -0.97683000 | 0.18147900  |                                                           |
| C                     | 7.30548000  | -0.74072600 | -1.01895300 |                                                           |
| H                     | 7.22430000  | 0.30564200  | -1.32361300 |                                                           |
| H                     | 8.34283600  | -0.97569200 | -0.79143200 |                                                           |
| H                     | 6.95047400  | -1.38915500 | -1.82385400 |                                                           |
| C                     | 1.71695700  | 2.16152000  | 1.66908400  |                                                           |
| H                     | 2.12414100  | 1.63971700  | 2.53803400  |                                                           |
| H                     | 2.53562500  | 2.33469100  | 0.96729400  |                                                           |
| H                     | 1.34089300  | 3.13139900  | 2.00448300  |                                                           |
| C                     | 0.79785600  | 2.85165500  | -1.05981000 |                                                           |
| H                     | 1.24948000  | 3.69015200  | -0.52689500 |                                                           |
| H                     | 1.60366300  | 2.22908600  | -1.45524600 |                                                           |
| H                     | 0.23120900  | 3.25384700  | -1.90283200 |                                                           |
| H                     | -6.21818600 | 0.99010700  | -0.97354200 |                                                           |
| O                     | -7.13645200 | -0.54555600 | -0.41214300 |                                                           |
| O                     | -6.24540700 | 0.05606100  | -1.24565500 |                                                           |
| <b>Name</b>           |             |             |             | <b>2-C2-H-OOH-G</b>                                       |
| Cartesian Coordinates |             |             |             | Frequency and Energy                                      |
| C                     | -0.81978100 | 1.88631900  | 0.47856300  | Zero-point correction= 0.365509 (Hartree/Particle)        |
| C                     | 0.56139400  | 2.35781400  | -0.03973300 | Thermal correction to Energy= 0.390177                    |
| C                     | 0.98554800  | 1.17699100  | -0.93878600 | Thermal correction to Enthalpy= 0.391121                  |
| C                     | -1.30475900 | 1.09508800  | -0.75317500 | Thermal correction to Gibbs Free Energy= 0.309716         |
| H                     | 0.33997200  | 3.21657900  | -0.68313900 | Sum of electronic and zero-point Energies= -1224.460149   |
| H                     | 1.20614500  | 1.67700200  | -2.07871100 | Sum of electronic and thermal Energies= -1224.435481      |
| H                     | -1.56286500 | 1.83421600  | -1.52447500 | Sum of electronic and thermal Enthalpies= -1224.434537    |
| O                     | -0.14393600 | 0.37467700  | -1.15102500 | Sum of electronic and thermal Free Energies= -1224.515941 |
| C                     | -2.46052600 | 0.16334600  | -0.52750800 |                                                           |
| C                     | -3.73148400 | 0.69965800  | -0.32738500 |                                                           |
| C                     | -2.29771100 | -1.21965500 | -0.46956000 |                                                           |
| C                     | -4.81632000 | -0.12614400 | -0.06109500 |                                                           |
| H                     | -3.86847600 | 1.77455200  | -0.36878500 |                                                           |
| C                     | -3.37713700 | -2.05429900 | -0.21162300 |                                                           |
| H                     | -1.31703000 | -1.64472600 | -0.64330000 |                                                           |
| C                     | -4.63887400 | -1.50672400 | -0.00249200 |                                                           |
| H                     | -5.80182900 | 0.30166500  | 0.09468500  |                                                           |
| H                     | -3.26309000 | -3.13055800 | -0.17358100 |                                                           |
| C                     | 2.18990700  | 0.36295300  | -0.63281500 |                                                           |
| C                     | 3.46275900  | 0.91615100  | -0.78188700 |                                                           |
| C                     | 2.07172000  | -0.96379900 | -0.20663500 |                                                           |
| C                     | 4.59806600  | 0.17626600  | -0.48170100 |                                                           |
| H                     | 3.56582800  | 1.92563000  | -1.16331300 |                                                           |
| C                     | 3.20551000  | -1.70016100 | 0.08635400  |                                                           |
| H                     | 1.08847300  | -1.41197000 | -0.10953700 |                                                           |
| C                     | 4.47792000  | -1.13472100 | -0.04226800 |                                                           |
| H                     | 5.59124600  | 0.59105300  | -0.60005200 |                                                           |
| C                     | 1.55585500  | 2.78527500  | 1.02967600  |                                                           |
| H                     | 1.87483500  | 1.94294900  | 1.64603400  |                                                           |
| H                     | 2.44863200  | 3.22568800  | 0.58386600  |                                                           |
| H                     | 1.10490100  | 3.54467600  | 1.67548000  |                                                           |
| C                     | -0.72683000 | 1.01553800  | 1.72217700  |                                                           |

|                              |             |             |             |                                                           |
|------------------------------|-------------|-------------|-------------|-----------------------------------------------------------|
| H                            | -0.32572300 | 1.58947600  | 2.56199500  |                                                           |
| H                            | -1.71535500 | 0.63876200  | 1.98956800  |                                                           |
| H                            | -0.06016800 | 0.16606700  | 1.55077700  |                                                           |
| O                            | -1.71905300 | 2.96197200  | 0.67058500  |                                                           |
| H                            | -1.58511900 | 3.33062200  | 1.54783400  |                                                           |
| O                            | -5.66330400 | -2.36853800 | 0.24917200  |                                                           |
| H                            | -6.48272200 | -1.87864700 | 0.35702300  |                                                           |
| O                            | 5.58528400  | -1.85941700 | 0.24568500  |                                                           |
| H                            | 5.31198700  | -2.74897500 | 0.49908300  |                                                           |
| O                            | 3.19238900  | -3.00155800 | 0.51686500  |                                                           |
| H                            | 2.30013100  | -3.35585300 | 0.49073200  |                                                           |
| H                            | 0.23237100  | 0.24508100  | -3.68626000 |                                                           |
| O                            | 1.08493600  | 1.86170800  | -3.32749900 |                                                           |
| O                            | 1.13196300  | 0.57815800  | -3.81800900 |                                                           |
| <b>Name</b>                  |             |             |             | <b>2-C5-H-OOH-G</b>                                       |
| <b>Cartesian Coordinates</b> |             |             |             | <b>Frequency and Energy</b>                               |
| C                            | -0.77922000 | 1.88344700  | 0.42919200  | Zero-point correction= 0.365703 (Hartree/Particle)        |
| C                            | 0.49844700  | 2.41519000  | -0.25368500 | Thermal correction to Energy= 0.390271                    |
| C                            | 0.92844900  | 1.24870100  | -1.18358500 | Thermal correction to Enthalpy= 0.391215                  |
| C                            | -1.34193300 | 1.02177300  | -0.71021900 | Thermal correction to Gibbs Free Energy= 0.310810         |
| H                            | 0.14570600  | 3.21845600  | -0.90798400 | Sum of electronic and zero-point Energies= -1224.460834   |
| H                            | 1.20766800  | 1.65658100  | -2.15713000 | Sum of electronic and thermal Energies= -1224.436266      |
| H                            | -1.81443200 | 1.88536300  | -1.50187500 | Sum of electronic and thermal Enthalpies= -1224.435322    |
| O                            | -0.26171200 | 0.46284300  | -1.37114500 | Sum of electronic and thermal Free Energies= -1224.515727 |
| C                            | -2.42596800 | 0.04190200  | -0.45205200 |                                                           |
| C                            | -3.59297000 | 0.45510200  | 0.19797300  |                                                           |
| C                            | -2.32165300 | -1.28836100 | -0.86876100 |                                                           |
| C                            | -4.61785300 | -0.44530900 | 0.44818200  |                                                           |
| H                            | -3.68998000 | 1.49005200  | 0.50542600  |                                                           |
| C                            | -3.34506400 | -2.19271200 | -0.62412900 |                                                           |
| H                            | -1.43014500 | -1.60838500 | -1.39412600 |                                                           |
| C                            | -4.49474300 | -1.77247600 | 0.03828600  |                                                           |
| H                            | -5.51980700 | -0.11640900 | 0.95503000  |                                                           |
| H                            | -3.27500300 | -3.22529700 | -0.94320400 |                                                           |
| C                            | 2.04990900  | 0.35406400  | -0.70191100 |                                                           |
| C                            | 3.36990300  | 0.78209900  | -0.82369700 |                                                           |
| C                            | 1.79933900  | -0.90085600 | -0.14682000 |                                                           |
| C                            | 4.42257000  | -0.00507300 | -0.36949400 |                                                           |
| H                            | 3.58407800  | 1.74000300  | -1.28522500 |                                                           |
| C                            | 2.84814600  | -1.68803900 | 0.30016300  |                                                           |
| H                            | 0.78048200  | -1.27080500 | -0.08488400 |                                                           |
| C                            | 4.16859800  | -1.24332900 | 0.20040000  |                                                           |
| H                            | 5.45172200  | 0.31977200  | -0.46000900 |                                                           |
| C                            | 1.56070700  | 2.96180900  | 0.68717100  |                                                           |
| H                            | 1.98443600  | 2.18269100  | 1.32313600  |                                                           |
| H                            | 2.38103100  | 3.41815700  | 0.12986900  |                                                           |
| H                            | 1.13339000  | 3.74096200  | 1.32578400  |                                                           |
| C                            | -0.51939500 | 1.07936400  | 1.69935800  |                                                           |
| H                            | -0.10166200 | 1.72857600  | 2.47453200  |                                                           |
| H                            | -1.45446900 | 0.65366600  | 2.06587900  |                                                           |
| H                            | 0.19548400  | 0.27460100  | 1.52250300  |                                                           |
| O                            | -1.71617300 | 2.91524300  | 0.69347900  |                                                           |
| H                            | -1.40114000 | 3.43136700  | 1.44096500  |                                                           |
| O                            | -5.46813100 | -2.69891100 | 0.25472900  |                                                           |

|                       |             |             |             |                                                           |
|-----------------------|-------------|-------------|-------------|-----------------------------------------------------------|
| H                     | -6.21625900 | -2.28895700 | 0.69693000  |                                                           |
| O                     | 5.19357200  | -2.01696500 | 0.63795100  |                                                           |
| H                     | 4.82929000  | -2.84154700 | 0.98021500  |                                                           |
| O                     | 2.69464100  | -2.93254300 | 0.85370900  |                                                           |
| H                     | 1.76613400  | -3.17766300 | 0.87739200  |                                                           |
| H                     | -1.23975900 | 1.68778900  | -3.89648200 |                                                           |
| O                     | -2.00169500 | 2.67713900  | -2.50834900 |                                                           |
| O                     | -0.93456800 | 2.41462800  | -3.33664000 |                                                           |
| <b>Name</b>           |             |             |             | <b>2-O9-H-OOH-G</b>                                       |
| Cartesian Coordinates |             |             |             | Frequency and Energy                                      |
| C                     | -0.79268700 | 1.77740600  | 0.39112300  | Zero-point correction= 0.365563 (Hartree/Particle)        |
| C                     | 0.56806600  | 2.29641500  | -0.12530300 | Thermal correction to Energy= 0.389829                    |
| C                     | 1.03444200  | 1.18271200  | -1.11693800 | Thermal correction to Enthalpy= 0.390773                  |
| C                     | -1.25873700 | 0.98248200  | -0.84939600 | Thermal correction to Gibbs Free Energy= 0.309176         |
| H                     | 0.31643200  | 3.17843300  | -0.72155400 | Sum of electronic and zero-point Energies= -1224.462086   |
| H                     | 1.27564100  | 1.64795000  | -2.07953300 | Sum of electronic and thermal Energies= -1224.437820      |
| H                     | -1.59414200 | 1.72734800  | -1.58733600 | Sum of electronic and thermal Enthalpies= -1224.436876    |
| O                     | -0.09439500 | 0.32545900  | -1.29833900 | Sum of electronic and thermal Free Energies= -1224.518473 |
| C                     | -2.36619400 | -0.00200300 | -0.60880000 |                                                           |
| C                     | -3.63933700 | 0.47783400  | -0.27625600 |                                                           |
| C                     | -2.14353200 | -1.38387200 | -0.68583300 |                                                           |
| C                     | -4.66842100 | -0.40081400 | -0.00095700 |                                                           |
| H                     | -3.80343000 | 1.54816300  | -0.22553900 |                                                           |
| C                     | -3.16918000 | -2.27276700 | -0.43056500 |                                                           |
| H                     | -1.16165200 | -1.73953200 | -0.97140700 |                                                           |
| C                     | -4.44905700 | -1.79932200 | -0.06382800 |                                                           |
| H                     | -5.65906200 | -0.04859700 | 0.25958900  |                                                           |
| H                     | -3.02414800 | -3.34482700 | -0.49048300 |                                                           |
| C                     | 2.22824400  | 0.36442400  | -0.68693200 |                                                           |
| C                     | 3.51247400  | 0.86611900  | -0.88065000 |                                                           |
| C                     | 2.07587500  | -0.87793000 | -0.07174200 |                                                           |
| C                     | 4.62940100  | 0.16169400  | -0.44396100 |                                                           |
| H                     | 3.64735500  | 1.81840400  | -1.38279600 |                                                           |
| C                     | 3.18854400  | -1.58335700 | 0.35691000  |                                                           |
| H                     | 1.08455700  | -1.30287800 | 0.04647900  |                                                           |
| C                     | 4.47472700  | -1.06549900 | 0.18212700  |                                                           |
| H                     | 5.63235100  | 0.54274400  | -0.59134000 |                                                           |
| C                     | 1.56362600  | 2.70638300  | 0.95020400  |                                                           |
| H                     | 1.89345000  | 1.85332700  | 1.54598000  |                                                           |
| H                     | 2.45262500  | 3.16018400  | 0.50839800  |                                                           |
| H                     | 1.11401800  | 3.44789700  | 1.61742600  |                                                           |
| C                     | -0.68915800 | 0.91398000  | 1.63931000  |                                                           |
| H                     | -0.29949900 | 1.50027800  | 2.47604400  |                                                           |
| H                     | -1.67189200 | 0.52490500  | 1.91090000  |                                                           |
| H                     | -0.00769000 | 0.07636100  | 1.47857500  |                                                           |
| O                     | -1.72326700 | 2.83058200  | 0.58678900  |                                                           |
| H                     | -1.58353800 | 3.21400600  | 1.45699100  |                                                           |
| O                     | -5.40434900 | -2.65264000 | 0.22364900  |                                                           |
| H                     | -6.27554300 | -2.53239300 | -0.49089700 |                                                           |
| O                     | 5.56189600  | -1.75908000 | 0.60207800  |                                                           |
| H                     | 5.26385000  | -2.59009200 | 0.98992400  |                                                           |
| O                     | 3.13655900  | -2.81141900 | 0.96268500  |                                                           |
| H                     | 2.22829500  | -3.11663800 | 1.02892700  |                                                           |
| H                     | -5.87433500 | -1.69081000 | -2.85842600 |                                                           |

|                       |             |             |             |                                                           |
|-----------------------|-------------|-------------|-------------|-----------------------------------------------------------|
| O                     | -6.95743700 | -2.36528400 | -1.50632100 |                                                           |
| O                     | -6.35462400 | -1.30283000 | -2.11174300 |                                                           |
| <b>Name</b>           |             |             |             | <b>2-O9-H-OOH-P</b>                                       |
| Cartesian Coordinates |             |             |             | Frequency and Energy                                      |
| C                     | -0.78363100 | 1.79100000  | 0.47985700  | Zero-point correction= 0.364760 (Hartree/Particle)        |
| C                     | 0.57608000  | 2.29452200  | -0.03883700 | Thermal correction to Energy= 0.388939                    |
| C                     | 1.00437100  | 1.20535400  | -1.07542300 | Thermal correction to Enthalpy= 0.389883                  |
| C                     | -1.27544500 | 1.03340900  | -0.78577500 | Thermal correction to Gibbs Free Energy= 0.308755         |
| H                     | 0.34049100  | 3.20205200  | -0.60223600 | Sum of electronic and zero-point Energies= -1224.496542   |
| H                     | 1.20167000  | 1.69694400  | -2.03440900 | Sum of electronic and thermal Energies= -1224.472363      |
| H                     | -1.57703600 | 1.80181300  | -1.51258700 | Sum of electronic and thermal Enthalpies= -1224.471419    |
| O                     | -0.12932500 | 0.34366400  | -1.23397600 | Sum of electronic and thermal Free Energies= -1224.552546 |
| C                     | -2.41918800 | 0.09471900  | -0.55836000 |                                                           |
| C                     | -3.71383700 | 0.62080000  | -0.45097800 |                                                           |
| C                     | -2.21607100 | -1.28269700 | -0.38765300 |                                                           |
| C                     | -4.78456600 | -0.20049600 | -0.15622000 |                                                           |
| H                     | -3.87470000 | 1.68127100  | -0.61587300 |                                                           |
| C                     | -3.27939300 | -2.11741000 | -0.10711100 |                                                           |
| H                     | -1.21539100 | -1.68396700 | -0.49066200 |                                                           |
| C                     | -4.58267700 | -1.58822400 | 0.03237500  |                                                           |
| H                     | -5.79143300 | 0.19229800  | -0.07274800 |                                                           |
| H                     | -3.14151600 | -3.18454900 | 0.02610600  |                                                           |
| C                     | 2.21865700  | 0.38301600  | -0.71850100 |                                                           |
| C                     | 3.48911000  | 0.88979200  | -0.98206000 |                                                           |
| C                     | 2.10250000  | -0.86206100 | -0.09958200 |                                                           |
| C                     | 4.63062200  | 0.18359400  | -0.61415700 |                                                           |
| H                     | 3.59333900  | 1.84763700  | -1.48097300 |                                                           |
| C                     | 3.23922400  | -1.56973700 | 0.25968500  |                                                           |
| H                     | 1.12317800  | -1.29063800 | 0.08608500  |                                                           |
| C                     | 4.51239000  | -1.04804000 | 0.01166000  |                                                           |
| H                     | 5.62174000  | 0.57306400  | -0.81589400 |                                                           |
| C                     | 1.59100700  | 2.64817100  | 1.03701900  |                                                           |
| H                     | 1.91597600  | 1.77066900  | 1.59996200  |                                                           |
| H                     | 2.47894300  | 3.10672800  | 0.59619500  |                                                           |
| H                     | 1.15349700  | 3.36847600  | 1.73331500  |                                                           |
| C                     | -0.68807300 | 0.88931200  | 1.70038700  |                                                           |
| H                     | -0.25720900 | 1.44001000  | 2.53838000  |                                                           |
| H                     | -1.68065700 | 0.53446800  | 1.99427200  |                                                           |
| H                     | -0.06042100 | 0.01802600  | 1.50172400  |                                                           |
| O                     | -1.60002800 | 2.91634900  | 0.75786700  |                                                           |
| H                     | -2.33218000 | 2.63358200  | 1.31752700  |                                                           |
| O                     | -5.58717600 | -2.38123400 | 0.34785000  |                                                           |
| H                     | -6.24852900 | -2.52507000 | -0.54567600 |                                                           |
| O                     | 5.62393200  | -1.74422800 | 0.36411000  |                                                           |
| H                     | 5.35115700  | -2.57564900 | 0.77243000  |                                                           |
| O                     | 3.22198600  | -2.79670700 | 0.86142500  |                                                           |
| H                     | 2.31591700  | -3.09966100 | 0.98763800  |                                                           |
| H                     | -5.24116500 | -2.32021600 | -2.84146400 |                                                           |
| O                     | -6.69133100 | -2.63985600 | -1.71310800 |                                                           |
| O                     | -5.91768600 | -1.76739100 | -2.41437500 |                                                           |
| <b>Name</b>           |             |             |             | <b>2-O9-H-OOH-W</b>                                       |
| Cartesian Coordinates |             |             |             | Frequency and Energy                                      |
| C                     | -0.77887300 | 1.85988300  | 0.54634600  | Zero-point correction= 0.365019 (Hartree/Particle)        |
| C                     | 0.58265700  | 2.35481100  | 0.02741700  | Thermal correction to Energy= 0.388748                    |

|                              |             |             |             |                                              |                             |
|------------------------------|-------------|-------------|-------------|----------------------------------------------|-----------------------------|
| C                            | 0.97446500  | 1.30910500  | -1.06081000 | Thermal correction to Enthalpy=              | 0.389692                    |
| C                            | -1.32181600 | 1.18368800  | -0.74409300 | Thermal correction to Gibbs Free Energy=     | 0.310790                    |
| H                            | 0.36320700  | 3.28903300  | -0.49709600 | Sum of electronic and zero-point Energies=   | -1224.505662                |
| H                            | 1.20640900  | 1.84349400  | -1.98702000 | Sum of electronic and thermal Energies=      | -1224.481933                |
| H                            | -1.64068900 | 1.99299500  | -1.41485300 | Sum of electronic and thermal Enthalpies=    | -1224.480989                |
| O                            | -0.19838300 | 0.50940200  | -1.28035400 | Sum of electronic and thermal Free Energies= | -1224.559891                |
| C                            | -2.46360800 | 0.23836200  | -0.52973900 |                                              |                             |
| C                            | -3.75860700 | 0.76681100  | -0.40230300 |                                              |                             |
| C                            | -2.26107500 | -1.14118800 | -0.39019200 |                                              |                             |
| C                            | -4.83135000 | -0.05664200 | -0.12996300 |                                              |                             |
| H                            | -3.91132200 | 1.83332300  | -0.53029800 |                                              |                             |
| C                            | -3.32616700 | -1.97791300 | -0.11806200 |                                              |                             |
| H                            | -1.26380600 | -1.54965300 | -0.49617600 |                                              |                             |
| C                            | -4.62714800 | -1.44516300 | 0.02706200  |                                              |                             |
| H                            | -5.83700000 | 0.33521900  | -0.03271300 |                                              |                             |
| H                            | -3.18921800 | -3.04788100 | -0.00644300 |                                              |                             |
| C                            | 2.14613800  | 0.41295800  | -0.73752500 |                                              |                             |
| C                            | 3.43989700  | 0.87599800  | -0.97282500 |                                              |                             |
| C                            | 1.97164300  | -0.85512400 | -0.18362900 |                                              |                             |
| C                            | 4.54536700  | 0.09844300  | -0.64056800 |                                              |                             |
| H                            | 3.58841100  | 1.85368100  | -1.41866500 |                                              |                             |
| C                            | 3.07264400  | -1.63578000 | 0.13790000  |                                              |                             |
| H                            | 0.97943100  | -1.25703300 | -0.01066200 |                                              |                             |
| C                            | 4.36665900  | -1.15851900 | -0.08243900 |                                              |                             |
| H                            | 5.55424300  | 0.45198800  | -0.81963300 |                                              |                             |
| C                            | 1.62339100  | 2.63616500  | 1.09969800  |                                              |                             |
| H                            | 1.92637400  | 1.72709300  | 1.62338200  |                                              |                             |
| H                            | 2.51638700  | 3.08464000  | 0.65902500  |                                              |                             |
| H                            | 1.21934000  | 3.34008300  | 1.83178400  |                                              |                             |
| C                            | -0.69164700 | 0.90158900  | 1.72250000  |                                              |                             |
| H                            | -0.21241300 | 1.39496200  | 2.56951100  |                                              |                             |
| H                            | -1.69377200 | 0.58738500  | 2.02761300  |                                              |                             |
| H                            | -0.11394500 | 0.01135800  | 1.46519400  |                                              |                             |
| O                            | -1.55915500 | 2.99591200  | 0.89743600  |                                              |                             |
| H                            | -2.35002000 | 2.69451800  | 1.36264400  |                                              |                             |
| O                            | -5.65029300 | -2.24161400 | 0.32127300  |                                              |                             |
| H                            | -5.96697500 | -2.76781600 | -0.60645500 |                                              |                             |
| O                            | 5.45991200  | -1.92535800 | 0.23093100  |                                              |                             |
| H                            | 5.16046900  | -2.76824600 | 0.59831200  |                                              |                             |
| O                            | 2.97691500  | -2.89505000 | 0.67374200  |                                              |                             |
| H                            | 2.04818400  | -3.13998000 | 0.77481100  |                                              |                             |
| H                            | -4.43892300 | -2.78967400 | -2.54096100 |                                              |                             |
| O                            | -6.13160600 | -3.13329800 | -1.81381100 |                                              |                             |
| O                            | -5.28720700 | -2.31405600 | -2.49206400 |                                              |                             |
| <b>Name</b>                  |             |             |             | <b>2-O14-H-OOH-G</b>                         |                             |
| <b>Cartesian Coordinates</b> |             |             |             | <b>Frequency and Energy</b>                  |                             |
| C                            | -0.78631800 | 1.83181000  | 0.44870800  | Zero-point correction=                       | 0.366588 (Hartree/Particle) |
| C                            | 0.58329300  | 2.31431600  | -0.08145800 | Thermal correction to Energy=                | 0.390442                    |
| C                            | 0.99424300  | 1.19231600  | -1.08705200 | Thermal correction to Enthalpy=              | 0.391386                    |
| C                            | -1.29722700 | 1.05956100  | -0.78648900 | Thermal correction to Gibbs Free Energy=     | 0.311454                    |
| H                            | 0.35191100  | 3.20829800  | -0.66746900 | Sum of electronic and zero-point Energies=   | -1224.468607                |
| H                            | 1.23456900  | 1.65495900  | -2.05245600 | Sum of electronic and thermal Energies=      | -1224.444752                |
| H                            | -1.60785800 | 1.81700300  | -1.52140400 | Sum of electronic and thermal Enthalpies=    | -1224.443808                |
| O                            | -0.15395500 | 0.36569500  | -1.25010400 | Sum of electronic and thermal Free Energies= | -1224.523740                |

|                       |             |             |             |                                                           |
|-----------------------|-------------|-------------|-------------|-----------------------------------------------------------|
| C                     | -2.43432300 | 0.11056600  | -0.53458200 |                                                           |
| C                     | -3.70721100 | 0.62642200  | -0.29818900 |                                                           |
| C                     | -2.24783000 | -1.26976100 | -0.48024900 |                                                           |
| C                     | -4.77086900 | -0.21598500 | 0.00129500  |                                                           |
| H                     | -3.86274200 | 1.69901800  | -0.33742200 |                                                           |
| C                     | -3.30534000 | -2.12084200 | -0.18827100 |                                                           |
| H                     | -1.26689700 | -1.68080500 | -0.68335300 |                                                           |
| C                     | -4.56905100 | -1.59313400 | 0.05745800  |                                                           |
| H                     | -5.75844500 | 0.19603500  | 0.18470300  |                                                           |
| H                     | -3.17113300 | -3.19476200 | -0.15068500 |                                                           |
| C                     | 2.17105500  | 0.33735500  | -0.68232800 |                                                           |
| C                     | 3.47838100  | 0.81837200  | -0.90048200 |                                                           |
| C                     | 2.00559600  | -0.90229300 | -0.09788000 |                                                           |
| C                     | 4.59631700  | 0.09389700  | -0.52857400 |                                                           |
| H                     | 3.61067000  | 1.78098100  | -1.38443800 |                                                           |
| C                     | 3.12471200  | -1.66864200 | 0.28185700  |                                                           |
| H                     | 1.01799700  | -1.31847000 | 0.06214500  |                                                           |
| C                     | 4.43101000  | -1.15730600 | 0.06175500  |                                                           |
| H                     | 5.59863600  | 0.46241800  | -0.70592200 |                                                           |
| C                     | 1.60743900  | 2.68437000  | 0.98195200  |                                                           |
| H                     | 1.91519000  | 1.81829100  | 1.57102800  |                                                           |
| H                     | 2.50495300  | 3.11602200  | 0.53395800  |                                                           |
| H                     | 1.18861000  | 3.43436800  | 1.65904000  |                                                           |
| C                     | -0.69391700 | 0.95728600  | 1.68906400  |                                                           |
| H                     | -0.26960800 | 1.52134000  | 2.52461100  |                                                           |
| H                     | -1.68647500 | 0.60038600  | 1.96877100  |                                                           |
| H                     | -0.05088400 | 0.09262000  | 1.51247300  |                                                           |
| O                     | -1.67467600 | 2.91765800  | 0.66433600  |                                                           |
| H                     | -1.59011500 | 3.21667600  | 1.57329700  |                                                           |
| O                     | -5.57251600 | -2.47051300 | 0.34131700  |                                                           |
| H                     | -6.39456900 | -1.99187200 | 0.47558800  |                                                           |
| O                     | 5.48973100  | -1.88989300 | 0.41523800  |                                                           |
| H                     | 5.15589700  | -2.71882700 | 0.79141700  |                                                           |
| O                     | 3.02329900  | -2.86594700 | 0.83017000  |                                                           |
| H                     | 2.76669500  | -3.59055100 | 0.02040800  |                                                           |
| H                     | 2.40177400  | -2.59499900 | -2.20936300 |                                                           |
| O                     | 2.61521800  | -4.10220100 | -1.13295400 |                                                           |
| O                     | 3.14771800  | -3.16081500 | -1.95040400 |                                                           |
| <b>Name</b>           |             |             |             | <b>2-O14-H-OOH-P</b>                                      |
| Cartesian Coordinates |             |             |             | Frequency and Energy                                      |
| C                     | -0.78285700 | 1.82607200  | 0.46908700  | Zero-point correction= 0.365878 (Hartree/Particle)        |
| C                     | 0.57935800  | 2.31564000  | -0.07369900 | Thermal correction to Energy= 0.389721                    |
| C                     | 0.98282700  | 1.20249500  | -1.09039900 | Thermal correction to Enthalpy= 0.390666                  |
| C                     | -1.31117100 | 1.07476200  | -0.77175400 | Thermal correction to Gibbs Free Energy= 0.310999         |
| H                     | 0.34228800  | 3.20986600  | -0.65671500 | Sum of electronic and zero-point Energies= -1224.502123   |
| H                     | 1.22856500  | 1.67424500  | -2.04898100 | Sum of electronic and thermal Energies= -1224.478280      |
| H                     | -1.63217500 | 1.84264200  | -1.49045800 | Sum of electronic and thermal Enthalpies= -1224.477335    |
| O                     | -0.17491800 | 0.38586800  | -1.26428400 | Sum of electronic and thermal Free Energies= -1224.557002 |
| C                     | -2.44643000 | 0.12165000  | -0.52476200 |                                                           |
| C                     | -3.73816900 | 0.62572200  | -0.38051500 |                                                           |
| C                     | -2.24319600 | -1.25020600 | -0.37457500 |                                                           |
| C                     | -4.80456400 | -0.21410900 | -0.08005600 |                                                           |
| H                     | -3.91321000 | 1.68984800  | -0.49818600 |                                                           |
| C                     | -3.30175900 | -2.10121200 | -0.08206400 |                                                           |

|                       |             |             |             |                                                           |
|-----------------------|-------------|-------------|-------------|-----------------------------------------------------------|
| H                     | -1.24725300 | -1.65853100 | -0.49697800 |                                                           |
| C                     | -4.58460100 | -1.58166700 | 0.07092300  |                                                           |
| H                     | -5.80622900 | 0.19003900  | 0.03051400  |                                                           |
| H                     | -3.14784800 | -3.16829500 | 0.02892400  |                                                           |
| C                     | 2.15396300  | 0.33569000  | -0.69376400 |                                                           |
| C                     | 3.46281300  | 0.82644100  | -0.88760300 |                                                           |
| C                     | 1.98670600  | -0.91620200 | -0.13697400 |                                                           |
| C                     | 4.57903100  | 0.10137200  | -0.51242300 |                                                           |
| H                     | 3.59699000  | 1.79904000  | -1.35038900 |                                                           |
| C                     | 3.10521000  | -1.68097500 | 0.24551400  |                                                           |
| H                     | 0.99904400  | -1.33832800 | 0.00807800  |                                                           |
| C                     | 4.41119100  | -1.15916500 | 0.05741700  |                                                           |
| H                     | 5.58054300  | 0.48418200  | -0.66709800 |                                                           |
| C                     | 1.61310100  | 2.68634600  | 0.97915600  |                                                           |
| H                     | 1.92982000  | 1.82246500  | 1.56733800  |                                                           |
| H                     | 2.50259300  | 3.12290700  | 0.51889700  |                                                           |
| H                     | 1.19976900  | 3.43493900  | 1.66176300  |                                                           |
| C                     | -0.67392000 | 0.93720000  | 1.69721600  |                                                           |
| H                     | -0.23412900 | 1.49136500  | 2.53119700  |                                                           |
| H                     | -1.66415000 | 0.58729000  | 1.99583900  |                                                           |
| H                     | -0.04076100 | 0.06812600  | 1.50430400  |                                                           |
| O                     | -1.66959400 | 2.90789200  | 0.71715900  |                                                           |
| H                     | -1.51800900 | 3.22995500  | 1.61186600  |                                                           |
| O                     | -5.58869500 | -2.45486700 | 0.35979600  |                                                           |
| H                     | -6.42200700 | -1.97726200 | 0.43958000  |                                                           |
| O                     | 5.47226100  | -1.88671500 | 0.42220800  |                                                           |
| H                     | 5.14681700  | -2.71964600 | 0.79840700  |                                                           |
| O                     | 2.99991300  | -2.88668000 | 0.78799700  |                                                           |
| H                     | 2.79710900  | -3.60315700 | -0.01469400 |                                                           |
| H                     | 2.47642400  | -2.63879400 | -2.27172800 |                                                           |
| O                     | 2.70993700  | -4.14916300 | -1.19784700 |                                                           |
| O                     | 3.23232900  | -3.18866600 | -1.99817400 |                                                           |
| <b>Name</b>           |             |             |             | <b>2-O14-H-OOH-W</b>                                      |
| Cartesian Coordinates |             |             |             | Frequency and Energy                                      |
| C                     | -0.80962600 | 1.79814400  | 0.51732300  | Zero-point correction= 0.365132 (Hartree/Particle)        |
| C                     | 0.53725500  | 2.29652200  | -0.04818400 | Thermal correction to Energy= 0.388878                    |
| C                     | 0.92549100  | 1.19238500  | -1.07874000 | Thermal correction to Enthalpy= 0.389822                  |
| C                     | -1.36966600 | 1.07411200  | -0.72381400 | Thermal correction to Gibbs Free Energy= 0.310957         |
| H                     | 0.29141900  | 3.19221700  | -0.62464700 | Sum of electronic and zero-point Energies= -1224.511727   |
| H                     | 1.15676200  | 1.67209400  | -2.03527600 | Sum of electronic and thermal Energies= -1224.487981      |
| H                     | -1.68812700 | 1.85475200  | -1.42792600 | Sum of electronic and thermal Enthalpies= -1224.487037    |
| O                     | -0.24323500 | 0.37979400  | -1.24589700 | Sum of electronic and thermal Free Energies= -1224.565902 |
| C                     | -2.51425800 | 0.13165400  | -0.48370300 |                                                           |
| C                     | -3.81990400 | 0.61707800  | -0.54048600 |                                                           |
| C                     | -2.31226100 | -1.20830500 | -0.14608400 |                                                           |
| C                     | -4.90530800 | -0.20562400 | -0.25681900 |                                                           |
| H                     | -3.99498200 | 1.65254300  | -0.81393800 |                                                           |
| C                     | -3.38699200 | -2.04390900 | 0.12904200  |                                                           |
| H                     | -1.30538700 | -1.60608600 | -0.09820300 |                                                           |
| C                     | -4.68390100 | -1.53813700 | 0.07786000  |                                                           |
| H                     | -5.91956500 | 0.17640400  | -0.30443400 |                                                           |
| H                     | -3.23349100 | -3.08573600 | 0.38538800  |                                                           |
| C                     | 2.10274200  | 0.32603100  | -0.70496700 |                                                           |
| C                     | 3.40287200  | 0.83927300  | -0.90947600 |                                                           |



|                              |             |             |             |                                                           |
|------------------------------|-------------|-------------|-------------|-----------------------------------------------------------|
| C                            | 1.95910800  | -0.93537500 | -0.16605900 |                                                           |
| C                            | 4.53152500  | 0.12576000  | -0.55588600 |                                                           |
| H                            | 3.51545800  | 1.82051200  | -1.35875600 |                                                           |
| C                            | 3.09132400  | -1.68516900 | 0.19902700  |                                                           |
| H                            | 0.98348600  | -1.38003700 | -0.01276200 |                                                           |
| C                            | 4.38703900  | -1.14186700 | 0.00635500  |                                                           |
| H                            | 5.52628600  | 0.52392700  | -0.71439100 |                                                           |
| C                            | 1.58432900  | 2.66253200  | 0.99221700  |                                                           |
| H                            | 1.91485400  | 1.79292600  | 1.56411300  |                                                           |
| H                            | 2.46101300  | 3.11234900  | 0.52113900  |                                                           |
| H                            | 1.16839500  | 3.39522800  | 1.68995800  |                                                           |
| C                            | -0.66877100 | 0.89392900  | 1.73062200  |                                                           |
| H                            | -0.21871600 | 1.44910500  | 2.55721600  |                                                           |
| H                            | -1.64971800 | 0.53539000  | 2.04803700  |                                                           |
| H                            | -0.03257200 | 0.03311600  | 1.51179900  |                                                           |
| O                            | -1.69044800 | 2.87726700  | 0.81307300  |                                                           |
| H                            | -1.38015800 | 3.30480300  | 1.62095100  |                                                           |
| O                            | -5.71343700 | -2.40053200 | 0.35941700  |                                                           |
| H                            | -6.55643500 | -1.93529900 | 0.28807900  |                                                           |
| O                            | 5.47772000  | -1.85166500 | 0.34780300  |                                                           |
| H                            | 5.19990900  | -2.68715300 | 0.75566000  |                                                           |
| O                            | 2.98953200  | -2.90307200 | 0.73756300  |                                                           |
| H                            | 3.13341300  | -3.63066000 | -0.04790200 |                                                           |
| H                            | 2.85102300  | -2.78674900 | -2.38192600 |                                                           |
| O                            | 3.36346200  | -4.18552800 | -1.24604800 |                                                           |
| O                            | 3.68550000  | -3.09852300 | -1.98725700 |                                                           |
| <b>Name</b>                  |             |             |             | <b>2-O15-H-OOH-G</b>                                      |
| <b>Cartesian Coordinates</b> |             |             |             | <b>Frequency and Energy</b>                               |
| C                            | -0.78179400 | 1.83766000  | 0.46349100  | Zero-point correction= 0.366291 (Hartree/Particle)        |
| C                            | 0.58680900  | 2.32586800  | -0.06541900 | Thermal correction to Energy= 0.390251                    |
| C                            | 0.98854000  | 1.21563200  | -1.09082000 | Thermal correction to Enthalpy= 0.391195                  |
| C                            | -1.30032700 | 1.08665600  | -0.78090600 | Thermal correction to Gibbs Free Energy= 0.310814         |
| H                            | 0.35468600  | 3.22789000  | -0.63849400 | Sum of electronic and zero-point Energies= -1224.468737   |
| H                            | 1.22673800  | 1.69100800  | -2.05058600 | Sum of electronic and thermal Energies= -1224.444776      |
| H                            | -1.61091600 | 1.85616800  | -1.50334300 | Sum of electronic and thermal Enthalpies= -1224.443832    |
| O                            | -0.16116500 | 0.39611100  | -1.25873000 | Sum of electronic and thermal Free Energies= -1224.524213 |
| C                            | -2.43885900 | 0.13610700  | -0.54082400 |                                                           |
| C                            | -3.70495700 | 0.65038900  | -0.26701100 |                                                           |
| C                            | -2.25915400 | -1.24613700 | -0.53881700 |                                                           |
| C                            | -4.76871300 | -0.19649900 | 0.01910500  |                                                           |
| H                            | -3.85494200 | 1.72449300  | -0.26681400 |                                                           |
| C                            | -3.31733000 | -2.10110200 | -0.26023200 |                                                           |
| H                            | -1.28412100 | -1.65419300 | -0.77389900 |                                                           |
| C                            | -4.57378500 | -1.57584300 | 0.02402100  |                                                           |
| H                            | -5.75111800 | 0.21389800  | 0.23169600  |                                                           |
| H                            | -3.18907300 | -3.17640800 | -0.26316000 |                                                           |
| C                            | 2.17088400  | 0.36379100  | -0.69928300 |                                                           |
| C                            | 3.46932100  | 0.87591000  | -0.90469600 |                                                           |
| C                            | 1.99979400  | -0.88932700 | -0.13177500 |                                                           |
| C                            | 4.57819400  | 0.15460100  | -0.51980400 |                                                           |
| H                            | 3.58963300  | 1.84814700  | -1.37054800 |                                                           |
| C                            | 3.11347900  | -1.63185000 | 0.25357900  |                                                           |
| H                            | 1.01171800  | -1.31191800 | -0.00678000 |                                                           |
| C                            | 4.42313600  | -1.11337000 | 0.07241600  |                                                           |

|                       |             |             |             |                                                           |
|-----------------------|-------------|-------------|-------------|-----------------------------------------------------------|
| H                     | 5.58462000  | 0.53280300  | -0.65848100 |                                                           |
| C                     | 1.61235400  | 2.68116500  | 1.00183300  |                                                           |
| H                     | 1.92593600  | 1.80633900  | 1.57491700  |                                                           |
| H                     | 2.50638600  | 3.12629400  | 0.56104800  |                                                           |
| H                     | 1.18936200  | 3.41574100  | 1.69315300  |                                                           |
| C                     | -0.68500000 | 0.94257700  | 1.68878800  |                                                           |
| H                     | -0.25601500 | 1.49176500  | 2.53179900  |                                                           |
| H                     | -1.67701500 | 0.58304400  | 1.96693900  |                                                           |
| H                     | -0.04469600 | 0.07975300  | 1.49427900  |                                                           |
| O                     | -1.66451300 | 2.92331700  | 0.70157900  |                                                           |
| H                     | -1.57300300 | 3.20772700  | 1.61456600  |                                                           |
| O                     | -5.57808500 | -2.45736100 | 0.29270500  |                                                           |
| H                     | -6.39386600 | -1.97885700 | 0.46131500  |                                                           |
| O                     | 5.44284200  | -1.86225600 | 0.45813700  |                                                           |
| H                     | 5.85203000  | -2.37206900 | -0.43481100 |                                                           |
| O                     | 2.95913600  | -2.83988500 | 0.80064400  |                                                           |
| H                     | 3.84196100  | -3.18608400 | 1.00090700  |                                                           |
| H                     | 4.72904300  | -1.82126600 | -2.58927000 |                                                           |
| O                     | 5.94339600  | -2.85369800 | -1.62348500 |                                                           |
| O                     | 4.69233700  | -2.66400500 | -2.10895700 |                                                           |
| <b>Name</b>           |             |             |             | <b>2-O15-H-OOH-P</b>                                      |
| Cartesian Coordinates |             |             |             | Frequency and Energy                                      |
| C                     | -0.77997400 | 1.82736800  | 0.48231400  | Zero-point correction= 0.365821 (Hartree/Particle)        |
| C                     | 0.58648200  | 2.31646000  | -0.05225200 | Thermal correction to Energy= 0.389675                    |
| C                     | 0.98158700  | 1.21332900  | -1.08638500 | Thermal correction to Enthalpy= 0.390619                  |
| C                     | -1.30988700 | 1.09054400  | -0.76611700 | Thermal correction to Gibbs Free Energy= 0.310906         |
| H                     | 0.35620800  | 3.21977900  | -0.62353100 | Sum of electronic and zero-point Energies= -1224.502302   |
| H                     | 1.22244700  | 1.69627700  | -2.04068100 | Sum of electronic and thermal Energies= -1224.478448      |
| H                     | -1.62497700 | 1.86639100  | -1.47894000 | Sum of electronic and thermal Enthalpies= -1224.477504    |
| O                     | -0.17599500 | 0.40027400  | -1.26188000 | Sum of electronic and thermal Free Energies= -1224.557217 |
| C                     | -2.44989700 | 0.14022100  | -0.53077000 |                                                           |
| C                     | -3.73809300 | 0.64941400  | -0.37339200 |                                                           |
| C                     | -2.25386400 | -1.23523800 | -0.40647900 |                                                           |
| C                     | -4.80848200 | -0.18960900 | -0.08527900 |                                                           |
| H                     | -3.90714900 | 1.71652800  | -0.47106600 |                                                           |
| C                     | -3.31682900 | -2.08511600 | -0.12648700 |                                                           |
| H                     | -1.26079800 | -1.64695300 | -0.54067000 |                                                           |
| C                     | -4.59614800 | -1.56103700 | 0.03959300  |                                                           |
| H                     | -5.80738800 | 0.21831500  | 0.03573100  |                                                           |
| H                     | -3.16889600 | -3.15499400 | -0.03636300 |                                                           |
| C                     | 2.15940900  | 0.35162000  | -0.70424200 |                                                           |
| C                     | 3.45939800  | 0.86198300  | -0.90804500 |                                                           |
| C                     | 1.98570300  | -0.90682500 | -0.14676900 |                                                           |
| C                     | 4.56644300  | 0.13470200  | -0.53059500 |                                                           |
| H                     | 3.58188000  | 1.83789400  | -1.36527800 |                                                           |
| C                     | 3.09782300  | -1.65487700 | 0.22911700  |                                                           |
| H                     | 0.99592000  | -1.32454000 | -0.01436900 |                                                           |
| C                     | 4.40699700  | -1.13810400 | 0.04956700  |                                                           |
| H                     | 5.57265100  | 0.51523700  | -0.66977000 |                                                           |
| C                     | 1.61922100  | 2.66658400  | 1.00884900  |                                                           |
| H                     | 1.93276900  | 1.79233000  | 1.58347700  |                                                           |
| H                     | 2.51062000  | 3.10932100  | 0.55910400  |                                                           |
| H                     | 1.20449600  | 3.40375500  | 1.70290300  |                                                           |
| C                     | -0.67805100 | 0.92577400  | 1.70166300  |                                                           |

|                              |             |             |             |                                                           |
|------------------------------|-------------|-------------|-------------|-----------------------------------------------------------|
| H                            | -0.23742600 | 1.46910400  | 2.54226600  |                                                           |
| H                            | -1.67082200 | 0.57806700  | 1.99427800  |                                                           |
| H                            | -0.04928900 | 0.05529900  | 1.50096300  |                                                           |
| O                            | -1.66042100 | 2.91203200  | 0.73927200  |                                                           |
| H                            | -1.51179100 | 3.22177300  | 1.63881800  |                                                           |
| O                            | -5.60493100 | -2.43342400 | 0.31483800  |                                                           |
| H                            | -6.43542300 | -1.95248900 | 0.40332000  |                                                           |
| O                            | 5.42763700  | -1.88998200 | 0.44094500  |                                                           |
| H                            | 5.86750300  | -2.35252700 | -0.44259500 |                                                           |
| O                            | 2.93932700  | -2.86849500 | 0.76972200  |                                                           |
| H                            | 3.81894400  | -3.21971800 | 0.97874500  |                                                           |
| H                            | 4.85791200  | -1.70967100 | -2.62195500 |                                                           |
| O                            | 6.01910200  | -2.81490600 | -1.66324700 |                                                           |
| O                            | 4.79993900  | -2.58914200 | -2.20835300 |                                                           |
| <b>Name</b>                  |             |             |             | <b>2-O15-H-OOH-W</b>                                      |
| <b>Cartesian Coordinates</b> |             |             |             | <b>Frequency and Energy</b>                               |
| C                            | -0.76704100 | 1.81113400  | 0.54794100  | Zero-point correction= 0.365126 (Hartree/Particle)        |
| C                            | 0.57940200  | 2.33670200  | 0.00351000  | Thermal correction to Energy= 0.388921                    |
| C                            | 0.98087000  | 1.26433500  | -1.05768100 | Thermal correction to Enthalpy= 0.389865                  |
| C                            | -1.31205900 | 1.10822000  | -0.71182400 | Thermal correction to Gibbs Free Energy= 0.310771         |
| H                            | 0.32934800  | 3.24556100  | -0.54972400 | Sum of electronic and zero-point Energies= -1224.512395   |
| H                            | 1.20428700  | 1.77264000  | -2.00122300 | Sum of electronic and thermal Energies= -1224.488601      |
| H                            | -1.63672300 | 1.90038100  | -1.40003200 | Sum of electronic and thermal Enthalpies= -1224.487657    |
| O                            | -0.17446500 | 0.43970100  | -1.24371900 | Sum of electronic and thermal Free Energies= -1224.566751 |
| C                            | -2.44436200 | 0.14412700  | -0.50100900 |                                                           |
| C                            | -3.75733500 | 0.60915200  | -0.55873900 |                                                           |
| C                            | -2.22298500 | -1.20013300 | -0.19388800 |                                                           |
| C                            | -4.83170500 | -0.23843600 | -0.30702300 |                                                           |
| H                            | -3.94713900 | 1.64803800  | -0.80835600 |                                                           |
| C                            | -3.28594800 | -2.06022800 | 0.04827200  |                                                           |
| H                            | -1.21018800 | -1.58227900 | -0.14498400 |                                                           |
| C                            | -4.59081200 | -1.57552700 | -0.00498000 |                                                           |
| H                            | -5.85169300 | 0.12806000  | -0.35500800 |                                                           |
| H                            | -3.11737900 | -3.10555200 | 0.27965600  |                                                           |
| C                            | 2.17439500  | 0.41273800  | -0.70760800 |                                                           |
| C                            | 3.46081700  | 0.95447300  | -0.92092000 |                                                           |
| C                            | 2.03691500  | -0.86052700 | -0.17610300 |                                                           |
| C                            | 4.58803300  | 0.23770200  | -0.59037500 |                                                           |
| H                            | 3.55316000  | 1.94418000  | -1.35422800 |                                                           |
| C                            | 3.17148100  | -1.59201900 | 0.16424400  |                                                           |
| H                            | 1.06224000  | -1.30637800 | -0.02502600 |                                                           |
| C                            | 4.46556600  | -1.04733700 | -0.03243900 |                                                           |
| H                            | 5.58342900  | 0.63599700  | -0.74884500 |                                                           |
| C                            | 1.61725500  | 2.68253500  | 1.05991400  |                                                           |
| H                            | 1.95467600  | 1.79985200  | 1.60751100  |                                                           |
| H                            | 2.49096700  | 3.15626000  | 0.60763900  |                                                           |
| H                            | 1.18842400  | 3.38869400  | 1.77683300  |                                                           |
| C                            | -0.62604900 | 0.88366200  | 1.74318800  |                                                           |
| H                            | -0.18799300 | 1.42598500  | 2.58463400  |                                                           |
| H                            | -1.60580600 | 0.50910600  | 2.04531600  |                                                           |
| H                            | 0.02011800  | 0.03378700  | 1.51214200  |                                                           |
| O                            | -1.66029300 | 2.87526200  | 0.85980300  |                                                           |
| H                            | -1.37401800 | 3.27367400  | 1.69104800  |                                                           |
| O                            | -5.60693900 | -2.46403900 | 0.24171600  |                                                           |

|                              |             |             |             |                                                           |
|------------------------------|-------------|-------------|-------------|-----------------------------------------------------------|
| H                            | -6.45814800 | -2.01469700 | 0.16825100  |                                                           |
| O                            | 5.52750200  | -1.77537600 | 0.32458800  |                                                           |
| H                            | 5.72236500  | -2.49406200 | -0.45434100 |                                                           |
| O                            | 3.03091600  | -2.82921500 | 0.67817700  |                                                           |
| H                            | 3.90553400  | -3.18475400 | 0.90048100  |                                                           |
| H                            | 4.79713400  | -1.94121800 | -2.69831200 |                                                           |
| O                            | 5.63803700  | -3.19973800 | -1.59675800 |                                                           |
| O                            | 4.51009400  | -2.68771900 | -2.14174400 |                                                           |
| <b>Name</b>                  |             |             |             | <b>3-C2-H-OOH-G</b>                                       |
| <b>Cartesian Coordinates</b> |             |             |             | <b>Frequency and Energy</b>                               |
| C                            | -0.92064500 | 2.04107200  | 0.01370400  | Zero-point correction= 0.362249 (Hartree/Particle)        |
| C                            | 0.50521400  | 1.68210200  | 0.50461200  | Thermal correction to Energy= 0.385005                    |
| C                            | 0.99277500  | 0.80751000  | -0.65244300 | Thermal correction to Enthalpy= 0.385949                  |
| C                            | -1.29594800 | 0.80325200  | -0.89004800 | Thermal correction to Gibbs Free Energy= 0.308972         |
| H                            | 1.08829900  | 2.60408300  | 0.57787200  | Sum of electronic and zero-point Energies= -1149.242951   |
| H                            | 1.23228100  | 1.60806300  | -1.55376300 | Sum of electronic and thermal Energies= -1149.220195      |
| H                            | -1.58618000 | 1.21240100  | -1.86366100 | Sum of electronic and thermal Enthalpies= -1149.219250    |
| O                            | -0.09148500 | 0.04662900  | -1.05898100 | Sum of electronic and thermal Free Energies= -1149.296227 |
| C                            | -2.38939900 | -0.10635400 | -0.39367400 |                                                           |
| C                            | -3.71912800 | 0.25221600  | -0.60141600 |                                                           |
| C                            | -2.11775000 | -1.28911200 | 0.29335900  |                                                           |
| C                            | -4.75745300 | -0.52975700 | -0.11063200 |                                                           |
| H                            | -3.95018000 | 1.15680000  | -1.15528500 |                                                           |
| C                            | -3.14568900 | -2.08262100 | 0.78358200  |                                                           |
| H                            | -1.08836000 | -1.59957600 | 0.42802300  |                                                           |
| C                            | -4.46920600 | -1.69901600 | 0.58857700  |                                                           |
| H                            | -5.78903400 | -0.23736800 | -0.28017900 |                                                           |
| H                            | -2.94289500 | -3.00510300 | 1.31345600  |                                                           |
| C                            | 2.24664800  | 0.02582800  | -0.54121900 |                                                           |
| C                            | 2.33590300  | -1.27354400 | -1.04194700 |                                                           |
| C                            | 3.38832100  | 0.61159100  | 0.02383900  |                                                           |
| C                            | 3.53113900  | -1.97705500 | -0.97165000 |                                                           |
| H                            | 1.45942400  | -1.73048700 | -1.48413100 |                                                           |
| C                            | 4.58468800  | -0.08239600 | 0.09246900  |                                                           |
| H                            | 3.33125800  | 1.62000400  | 0.41964300  |                                                           |
| C                            | 4.65746300  | -1.38216900 | -0.40754300 |                                                           |
| H                            | 3.58978200  | -2.99024900 | -1.35702800 |                                                           |
| C                            | 0.54376000  | 0.92131400  | 1.83198100  |                                                           |
| H                            | -0.05730100 | 0.01033900  | 1.77916200  |                                                           |
| H                            | 1.56636300  | 0.63620800  | 2.08301800  |                                                           |
| H                            | 0.15329800  | 1.54002800  | 2.64097900  |                                                           |
| C                            | -1.91300900 | 2.33349900  | 1.12465800  |                                                           |
| H                            | -1.53438500 | 3.15876700  | 1.73083300  |                                                           |
| H                            | -2.86317700 | 2.64290800  | 0.68632300  |                                                           |
| H                            | -2.09153700 | 1.46415000  | 1.75723700  |                                                           |
| O                            | -0.89913600 | 3.21696800  | -0.77955400 |                                                           |
| H                            | -0.13943600 | 3.20951300  | -1.37948800 |                                                           |
| O                            | -5.43968600 | -2.51220200 | 1.09197900  |                                                           |
| H                            | -6.30583500 | -2.14603000 | 0.89526700  |                                                           |
| O                            | 5.85423600  | -2.01963100 | -0.31236800 |                                                           |
| H                            | 5.78377600  | -2.90627500 | -0.67644200 |                                                           |
| H                            | 5.46981400  | 0.35727800  | 0.53494900  |                                                           |
| H                            | 3.37142500  | 2.81259600  | -2.11884300 |                                                           |
| O                            | 1.52787700  | 2.68158100  | -2.32828900 |                                                           |

|                              |             |             |             |                                                           |
|------------------------------|-------------|-------------|-------------|-----------------------------------------------------------|
| O                            | 2.61267200  | 3.23542000  | -1.69201300 |                                                           |
| <b>Name</b>                  |             |             |             | <b>3-C2-H-OOH-P</b>                                       |
| <b>Cartesian Coordinates</b> |             |             |             | <b>Frequency and Energy</b>                               |
| C                            | -0.91262400 | 2.04192800  | 0.03501900  | Zero-point correction= 0.361406 (Hartree/Particle)        |
| C                            | 0.51193700  | 1.67577300  | 0.52321500  | Thermal correction to Energy= 0.384277                    |
| C                            | 0.99845400  | 0.81088300  | -0.64293000 | Thermal correction to Enthalpy= 0.385221                  |
| C                            | -1.29388300 | 0.81580500  | -0.87917500 | Thermal correction to Gibbs Free Energy= 0.307365         |
| H                            | 1.09816900  | 2.59436400  | 0.60659900  | Sum of electronic and zero-point Energies= -1149.275152   |
| H                            | 1.23899300  | 1.61145000  | -1.53768600 | Sum of electronic and thermal Energies= -1149.252281      |
| H                            | -1.59026100 | 1.23063400  | -1.84859000 | Sum of electronic and thermal Enthalpies= -1149.251337    |
| O                            | -0.08908800 | 0.06027300  | -1.06143500 | Sum of electronic and thermal Free Energies= -1149.329193 |
| C                            | -2.38744300 | -0.09914400 | -0.39042100 |                                                           |
| C                            | -3.71771600 | 0.25463400  | -0.61130700 |                                                           |
| C                            | -2.11759800 | -1.28060300 | 0.30013100  |                                                           |
| C                            | -4.75870200 | -0.53186000 | -0.13249800 |                                                           |
| H                            | -3.94796600 | 1.15832800  | -1.16737500 |                                                           |
| C                            | -3.14834300 | -2.07953900 | 0.77882700  |                                                           |
| H                            | -1.08974200 | -1.58859900 | 0.45289900  |                                                           |
| C                            | -4.47182800 | -1.70093300 | 0.56932100  |                                                           |
| H                            | -5.79071200 | -0.24602100 | -0.31163100 |                                                           |
| H                            | -2.94100900 | -3.00039100 | 1.31135000  |                                                           |
| C                            | 2.24951600  | 0.02215000  | -0.53548400 |                                                           |
| C                            | 2.33494700  | -1.28200700 | -1.02662600 |                                                           |
| C                            | 3.39446900  | 0.61100400  | 0.01981300  |                                                           |
| C                            | 3.52862800  | -1.98884200 | -0.95492100 |                                                           |
| H                            | 1.45939000  | -1.74709700 | -1.46278200 |                                                           |
| C                            | 4.58976200  | -0.08511600 | 0.09032700  |                                                           |
| H                            | 3.34382100  | 1.62162800  | 0.41136500  |                                                           |
| C                            | 4.65789600  | -1.39025600 | -0.39860100 |                                                           |
| H                            | 3.58472100  | -3.00583200 | -1.33126500 |                                                           |
| C                            | 0.55308700  | 0.90895000  | 1.84583900  |                                                           |
| H                            | -0.03524100 | -0.01048600 | 1.79284800  |                                                           |
| H                            | 1.57936900  | 0.63857200  | 2.09998300  |                                                           |
| H                            | 0.15612700  | 1.52224400  | 2.65643600  |                                                           |
| C                            | -1.90437200 | 2.33364800  | 1.14456700  |                                                           |
| H                            | -1.52712900 | 3.15541700  | 1.75738700  |                                                           |
| H                            | -2.85812900 | 2.64081600  | 0.71048500  |                                                           |
| H                            | -2.07924200 | 1.46371100  | 1.77769100  |                                                           |
| O                            | -0.87703700 | 3.22620800  | -0.75526300 |                                                           |
| H                            | -0.13867100 | 3.18452900  | -1.38027500 |                                                           |
| O                            | -5.44601500 | -2.51469900 | 1.06005200  |                                                           |
| H                            | -6.31258600 | -2.14811600 | 0.85090500  |                                                           |
| O                            | 5.85048000  | -2.03142400 | -0.30262300 |                                                           |
| H                            | 5.77419500  | -2.92230200 | -0.66381100 |                                                           |
| H                            | 5.47481500  | 0.36290500  | 0.52604500  |                                                           |
| H                            | 3.33179800  | 2.86747800  | -2.19305300 |                                                           |
| O                            | 1.48825000  | 2.66130400  | -2.38415800 |                                                           |
| O                            | 2.55607800  | 3.30180400  | -1.80427000 |                                                           |
| <b>Name</b>                  |             |             |             | <b>3-C2-H-OOH-W</b>                                       |
| <b>Cartesian Coordinates</b> |             |             |             | <b>Frequency and Energy</b>                               |
| C                            | -0.89989300 | 2.05989700  | 0.04199300  | Zero-point correction= 0.360650 (Hartree/Particle)        |
| C                            | 0.51978000  | 1.66586800  | 0.51536000  | Thermal correction to Energy= 0.383583                    |
| C                            | 1.00364500  | 0.84208500  | -0.68027300 | Thermal correction to Enthalpy= 0.384527                  |
| C                            | -1.30470600 | 0.87098800  | -0.90093800 | Thermal correction to Gibbs Free Energy= 0.306624         |

|                       |             |             |             |                                              |                             |
|-----------------------|-------------|-------------|-------------|----------------------------------------------|-----------------------------|
| H                     | 1.11641200  | 2.57398000  | 0.62903000  | Sum of electronic and zero-point Energies=   | -1149.283036                |
| H                     | 1.28070000  | 1.67015000  | -1.52965300 | Sum of electronic and thermal Energies=      | -1149.260102                |
| H                     | -1.63873800 | 1.31409400  | -1.84421400 | Sum of electronic and thermal Enthalpies=    | -1149.259158                |
| O                     | -0.09915200 | 0.13313400  | -1.15356900 | Sum of electronic and thermal Free Energies= | -1149.337062                |
| C                     | -2.37353000 | -0.06972000 | -0.40459300 |                                              |                             |
| C                     | -3.71347700 | 0.27880300  | -0.57732500 |                                              |                             |
| C                     | -2.07205100 | -1.26999900 | 0.23835300  |                                              |                             |
| C                     | -4.73411900 | -0.53454400 | -0.09987700 |                                              |                             |
| H                     | -3.96493300 | 1.19969700  | -1.09412300 |                                              |                             |
| C                     | -3.08287400 | -2.09736600 | 0.71424400  |                                              |                             |
| H                     | -1.03835500 | -1.57201100 | 0.36084200  |                                              |                             |
| C                     | -4.41339500 | -1.72438000 | 0.54975400  |                                              |                             |
| H                     | -5.77486100 | -0.26017900 | -0.23651200 |                                              |                             |
| H                     | -2.85103200 | -3.03326700 | 1.20923600  |                                              |                             |
| C                     | 2.23079900  | 0.01550000  | -0.57471100 |                                              |                             |
| C                     | 2.26766000  | -1.31591400 | -0.99218400 |                                              |                             |
| C                     | 3.40195700  | 0.60345600  | -0.07679700 |                                              |                             |
| C                     | 3.44374200  | -2.05236100 | -0.90553700 |                                              |                             |
| H                     | 1.37312200  | -1.78528800 | -1.38268500 |                                              |                             |
| C                     | 4.57878100  | -0.12171100 | 0.00926600  |                                              |                             |
| H                     | 3.38507500  | 1.63716900  | 0.25306800  |                                              |                             |
| C                     | 4.59730500  | -1.45343400 | -0.40656200 |                                              |                             |
| H                     | 3.47191000  | -3.08942300 | -1.22266900 |                                              |                             |
| C                     | 0.55786200  | 0.85620100  | 1.81185600  |                                              |                             |
| H                     | -0.03002900 | -0.06083500 | 1.72630600  |                                              |                             |
| H                     | 1.58598400  | 0.58230000  | 2.05431700  |                                              |                             |
| H                     | 0.16110800  | 1.44481400  | 2.64029300  |                                              |                             |
| C                     | -1.88236700 | 2.34313600  | 1.16076400  |                                              |                             |
| H                     | -1.49326200 | 3.14863000  | 1.78764000  |                                              |                             |
| H                     | -2.83922700 | 2.65894000  | 0.73943100  |                                              |                             |
| H                     | -2.05225400 | 1.46262800  | 1.77997000  |                                              |                             |
| O                     | -0.84520300 | 3.26841600  | -0.72572400 |                                              |                             |
| H                     | -0.17516500 | 3.19129200  | -1.42253200 |                                              |                             |
| O                     | -5.37659600 | -2.57284100 | 1.03497000  |                                              |                             |
| H                     | -6.25256100 | -2.20989700 | 0.85297000  |                                              |                             |
| O                     | 5.78113800  | -2.13111600 | -0.29877700 |                                              |                             |
| H                     | 5.66592900  | -3.04012300 | -0.60355100 |                                              |                             |
| H                     | 5.48554900  | 0.32578700  | 0.39856100  |                                              |                             |
| H                     | 3.31381700  | 3.12566700  | -1.81960300 |                                              |                             |
| O                     | 1.56549800  | 2.73292900  | -2.36243900 |                                              |                             |
| O                     | 2.43957000  | 3.51202100  | -1.64845300 |                                              |                             |
| <b>Name</b>           |             |             |             | <b>3-C5-H-OOH-G</b>                          |                             |
| Cartesian Coordinates |             |             |             | Frequency and Energy                         |                             |
| C                     | -0.76228700 | 2.03974700  | 0.22337800  | Zero-point correction=                       | 0.360953 (Hartree/Particle) |
| C                     | 0.67620300  | 1.70582400  | 0.68846700  | Thermal correction to Energy=                | 0.384176                    |
| C                     | 1.20579200  | 0.99493700  | -0.57211100 | Thermal correction to Enthalpy=              | 0.385120                    |
| C                     | -1.05939500 | 0.84768700  | -0.73365700 | Thermal correction to Gibbs Free Energy=     | 0.306845                    |
| H                     | 1.22331600  | 2.63560600  | 0.87110700  | Sum of electronic and zero-point Energies=   | -1149.235091                |
| H                     | 1.33512900  | 1.73508600  | -1.37128200 | Sum of electronic and thermal Energies=      | -1149.211868                |
| H                     | -1.34575100 | 1.40331200  | -1.84729600 | Sum of electronic and thermal Enthalpies=    | -1149.210923                |
| O                     | 0.11663000  | 0.14021100  | -0.92078200 | Sum of electronic and thermal Free Energies= | -1149.289198                |
| C                     | -2.22027800 | -0.04877800 | -0.49442300 |                                              |                             |
| C                     | -3.51858400 | 0.43378100  | -0.68418900 |                                              |                             |
| C                     | -2.05191800 | -1.38286100 | -0.11308400 |                                              |                             |

|                       |             |             |             |                                                           |
|-----------------------|-------------|-------------|-------------|-----------------------------------------------------------|
| C                     | -4.62119200 | -0.38315700 | -0.47028100 |                                                           |
| H                     | -3.66132000 | 1.45531600  | -1.02357500 |                                                           |
| C                     | -3.14655800 | -2.20579000 | 0.10322700  |                                                           |
| H                     | -1.04807500 | -1.77044100 | 0.01045400  |                                                           |
| C                     | -4.43480700 | -1.70584700 | -0.07060500 |                                                           |
| H                     | -5.62451300 | 0.00270500  | -0.62187900 |                                                           |
| H                     | -3.02567600 | -3.23946800 | 0.40271600  |                                                           |
| C                     | 2.46703100  | 0.19841100  | -0.39832900 |                                                           |
| C                     | 2.46354600  | -1.18977600 | -0.33462000 |                                                           |
| C                     | 3.68066200  | 0.87374300  | -0.25293400 |                                                           |
| C                     | 3.64608000  | -1.89317300 | -0.12198200 |                                                           |
| H                     | 1.53154300  | -1.72508200 | -0.46538500 |                                                           |
| C                     | 4.86311600  | 0.18536200  | -0.03410100 |                                                           |
| H                     | 3.70133900  | 1.95760700  | -0.31538900 |                                                           |
| C                     | 4.84516700  | -1.20648700 | 0.03291900  |                                                           |
| H                     | 3.63376400  | -2.97804500 | -0.08162700 |                                                           |
| C                     | 0.73409200  | 0.80481400  | 1.91881400  |                                                           |
| H                     | 0.18189800  | -0.12442200 | 1.74824600  |                                                           |
| H                     | 1.76756800  | 0.54130000  | 2.14951300  |                                                           |
| H                     | 0.30555400  | 1.30068900  | 2.79100400  |                                                           |
| C                     | -1.76786900 | 2.23302700  | 1.34840600  |                                                           |
| H                     | -1.41347600 | 3.01358900  | 2.02964600  |                                                           |
| H                     | -2.72875500 | 2.54507600  | 0.93775200  |                                                           |
| H                     | -1.91854000 | 1.31723900  | 1.92061600  |                                                           |
| O                     | -0.73758200 | 3.19951800  | -0.60881400 |                                                           |
| H                     | -0.57825800 | 3.96874400  | -0.05363500 |                                                           |
| O                     | -5.47211800 | -2.55674400 | 0.15409100  |                                                           |
| H                     | -6.30655200 | -2.10511600 | 0.00201200  |                                                           |
| O                     | 6.03405500  | -1.83764400 | 0.24615900  |                                                           |
| H                     | 5.89975200  | -2.78892600 | 0.25480500  |                                                           |
| H                     | 5.80790000  | 0.70248400  | 0.07764000  |                                                           |
| H                     | -2.84535800 | 0.11597800  | -3.26891400 |                                                           |
| O                     | -1.79112800 | 1.63397900  | -3.00825000 |                                                           |
| O                     | -1.95710600 | 0.38229700  | -3.54968700 |                                                           |
| <b>Name</b>           |             |             |             | <b>3-O9-H-OOH-G</b>                                       |
| Cartesian Coordinates |             |             |             | Frequency and Energy                                      |
| C                     | -0.79693800 | 2.10360900  | 0.22399700  | Zero-point correction= 0.361330 (Hartree/Particle)        |
| C                     | 0.61325100  | 1.68923500  | 0.70068600  | Thermal correction to Energy= 0.384105                    |
| C                     | 1.16944900  | 1.07282100  | -0.59858100 | Thermal correction to Enthalpy= 0.385049                  |
| C                     | -1.10955700 | 1.03291400  | -0.88440500 | Thermal correction to Gibbs Free Energy= 0.306874         |
| H                     | 1.17634100  | 2.58778800  | 0.97197600  | Sum of electronic and zero-point Energies= -1149.239455   |
| H                     | 1.37008900  | 1.88460400  | -1.31047900 | Sum of electronic and thermal Energies= -1149.216680      |
| H                     | -1.33726100 | 1.60595200  | -1.79143200 | Sum of electronic and thermal Enthalpies= -1149.215736    |
| O                     | 0.08202000  | 0.29196200  | -1.07491600 | Sum of electronic and thermal Free Energies= -1149.293911 |
| C                     | -2.25625300 | 0.10244400  | -0.59681100 |                                                           |
| C                     | -3.56862300 | 0.55158000  | -0.82387700 |                                                           |
| C                     | -2.05075100 | -1.18345500 | -0.09435000 |                                                           |
| C                     | -4.65064300 | -0.25077900 | -0.53675700 |                                                           |
| H                     | -3.72307000 | 1.54273700  | -1.23928400 |                                                           |
| C                     | -3.12660200 | -1.99952700 | 0.20961000  |                                                           |
| H                     | -1.03727100 | -1.53786600 | 0.04419200  |                                                           |
| C                     | -4.45052000 | -1.54299200 | 0.00540700  |                                                           |
| H                     | -5.66901100 | 0.07737900  | -0.70591700 |                                                           |
| H                     | -2.98427100 | -2.99878000 | 0.60238700  |                                                           |

|                       |             |             |             |                                                           |
|-----------------------|-------------|-------------|-------------|-----------------------------------------------------------|
| C                     | 2.39905900  | 0.22275700  | -0.44241200 |                                                           |
| C                     | 2.34703000  | -1.16523200 | -0.49267400 |                                                           |
| C                     | 3.62747300  | 0.83855800  | -0.19378100 |                                                           |
| C                     | 3.49492000  | -1.92675400 | -0.29011500 |                                                           |
| H                     | 1.40382200  | -1.65291900 | -0.70458100 |                                                           |
| C                     | 4.77577000  | 0.09178900  | 0.01625800  |                                                           |
| H                     | 3.68719400  | 1.92249500  | -0.16509900 |                                                           |
| C                     | 4.70843000  | -1.29943500 | -0.03079700 |                                                           |
| H                     | 3.44442500  | -3.01022700 | -0.33825900 |                                                           |
| C                     | 0.61890700  | 0.70278600  | 1.86506500  |                                                           |
| H                     | 0.06061700  | -0.20379000 | 1.61795000  |                                                           |
| H                     | 1.64131900  | 0.40858700  | 2.10778300  |                                                           |
| H                     | 0.17102800  | 1.14453400  | 2.75658900  |                                                           |
| C                     | -1.83432500 | 2.23277900  | 1.32838900  |                                                           |
| H                     | -1.48838800 | 2.95071100  | 2.07898100  |                                                           |
| H                     | -2.77669700 | 2.59455000  | 0.91394000  |                                                           |
| H                     | -2.02117900 | 1.28046300  | 1.82587000  |                                                           |
| O                     | -0.71127700 | 3.33342700  | -0.50090900 |                                                           |
| H                     | -0.53655000 | 4.04322500  | 0.12437800  |                                                           |
| O                     | -5.48537600 | -2.28650200 | 0.31654100  |                                                           |
| H                     | -5.47444000 | -3.26106000 | -0.26437800 |                                                           |
| O                     | 5.86512400  | -1.98883800 | 0.17850600  |                                                           |
| H                     | 5.69674000  | -2.93266900 | 0.11588100  |                                                           |
| H                     | 5.73144700  | 0.56293000  | 0.20933300  |                                                           |
| H                     | -4.34161000 | -3.41400600 | -2.54716300 |                                                           |
| O                     | -5.36678600 | -4.10317300 | -1.15749900 |                                                           |
| O                     | -4.14349000 | -3.83059000 | -1.69519700 |                                                           |
| <b>Name</b>           |             |             |             | <b>3-O9-H-OOH-P</b>                                       |
| Cartesian Coordinates |             |             |             | Frequency and Energy                                      |
| C                     | -0.80458800 | 2.10413700  | 0.21529600  | Zero-point correction= 0.360601 (Hartree/Particle)        |
| C                     | 0.60356800  | 1.69060900  | 0.69887100  | Thermal correction to Energy= 0.383435                    |
| C                     | 1.16934700  | 1.08119500  | -0.59874500 | Thermal correction to Enthalpy= 0.384379                  |
| C                     | -1.11884300 | 1.02715400  | -0.88398300 | Thermal correction to Gibbs Free Energy= 0.305345         |
| H                     | 1.16282400  | 2.58970200  | 0.97427200  | Sum of electronic and zero-point Energies= -1149.272962   |
| H                     | 1.38535600  | 1.89671600  | -1.30062500 | Sum of electronic and thermal Energies= -1149.250129      |
| H                     | -1.37988600 | 1.58884400  | -1.78889600 | Sum of electronic and thermal Enthalpies= -1149.249185    |
| O                     | 0.08412600  | 0.30698200  | -1.09956400 | Sum of electronic and thermal Free Energies= -1149.328218 |
| C                     | -2.24243400 | 0.07373500  | -0.57512200 |                                                           |
| C                     | -3.56670500 | 0.49487600  | -0.78796000 |                                                           |
| C                     | -2.00379500 | -1.20851400 | -0.07349200 |                                                           |
| C                     | -4.62867900 | -0.33040300 | -0.48723700 |                                                           |
| H                     | -3.74839200 | 1.48214100  | -1.20124900 |                                                           |
| C                     | -3.05870100 | -2.04766500 | 0.23818000  |                                                           |
| H                     | -0.98326400 | -1.54433400 | 0.06055200  |                                                           |
| C                     | -4.39247500 | -1.61764400 | 0.04898100  |                                                           |
| H                     | -5.65420800 | -0.01713800 | -0.64544600 |                                                           |
| H                     | -2.88759200 | -3.04405500 | 0.62937300  |                                                           |
| C                     | 2.39488300  | 0.22434400  | -0.44095700 |                                                           |
| C                     | 2.32514800  | -1.16457300 | -0.38837700 |                                                           |
| C                     | 3.64031300  | 0.83726100  | -0.28689500 |                                                           |
| C                     | 3.47068900  | -1.92890600 | -0.18234300 |                                                           |
| H                     | 1.36892200  | -1.65686400 | -0.51856500 |                                                           |
| C                     | 4.78842800  | 0.08833900  | -0.07298800 |                                                           |
| H                     | 3.71464800  | 1.91961400  | -0.33645600 |                                                           |



|                       |             |             |             |                                                           |
|-----------------------|-------------|-------------|-------------|-----------------------------------------------------------|
| C                     | 4.70259400  | -1.30199500 | -0.02042400 |                                                           |
| H                     | 3.40646000  | -3.01243900 | -0.15038100 |                                                           |
| C                     | 0.60239500  | 0.70810400  | 1.86545700  |                                                           |
| H                     | 0.05179500  | -0.20490700 | 1.62332500  |                                                           |
| H                     | 1.62456200  | 0.42453100  | 2.12461100  |                                                           |
| H                     | 0.14451400  | 1.15437900  | 2.75004500  |                                                           |
| C                     | -1.84335900 | 2.25059500  | 1.31481700  |                                                           |
| H                     | -1.49642400 | 2.98138500  | 2.05234000  |                                                           |
| H                     | -2.78505200 | 2.60919000  | 0.89425800  |                                                           |
| H                     | -2.03230900 | 1.30757800  | 1.82974100  |                                                           |
| O                     | -0.70886300 | 3.33091900  | -0.51753800 |                                                           |
| H                     | -0.51154500 | 4.03626000  | 0.10929100  |                                                           |
| O                     | -5.40822100 | -2.39178200 | 0.37437800  |                                                           |
| H                     | -5.44609400 | -3.27820800 | -0.30626600 |                                                           |
| O                     | 5.85594700  | -1.99612200 | 0.18496900  |                                                           |
| H                     | 5.66878900  | -2.94158800 | 0.19457600  |                                                           |
| H                     | 5.75504100  | 0.56369000  | 0.04584100  |                                                           |
| H                     | -4.48856500 | -3.09565600 | -2.63746300 |                                                           |
| O                     | -5.37411600 | -4.04622400 | -1.29944900 |                                                           |
| O                     | -4.21267100 | -3.65923900 | -1.89470800 |                                                           |
| <b>Name</b>           |             |             |             | <b>3-O9-H-OOH-W</b>                                       |
| Cartesian Coordinates |             |             |             | Frequency and Energy                                      |
| C                     | 0.12359400  | 2.39915400  | 0.02979500  | Zero-point correction= 0.359648 (Hartree/Particle)        |
| C                     | 1.48690400  | 1.84592800  | 0.49805500  | Thermal correction to Energy= 0.381617                    |
| C                     | 1.85333100  | 0.95751300  | -0.70435500 | Thermal correction to Enthalpy= 0.382561                  |
| C                     | -0.44377400 | 1.22947200  | -0.84696500 | Thermal correction to Gibbs Free Energy= 0.307078         |
| H                     | 2.19177000  | 2.67749500  | 0.58187800  | Sum of electronic and zero-point Energies= -1149.280394   |
| H                     | 2.14188800  | 1.60380000  | -1.54142700 | Sum of electronic and thermal Energies= -1149.258426      |
| H                     | -0.71039400 | 1.66922200  | -1.81451500 | Sum of electronic and thermal Enthalpies= -1149.257481    |
| O                     | 0.62201700  | 0.30345000  | -1.02481900 | Sum of electronic and thermal Free Energies= -1149.332965 |
| C                     | -1.65854000 | 0.52940900  | -0.29973400 |                                                           |
| C                     | -2.91534000 | 1.12279400  | -0.49465300 |                                                           |
| C                     | -1.56743200 | -0.67920900 | 0.40347200  |                                                           |
| C                     | -4.05505300 | 0.54574100  | 0.02515400  |                                                           |
| H                     | -2.98436800 | 2.04519800  | -1.06177100 |                                                           |
| C                     | -2.70157800 | -1.27627200 | 0.91964200  |                                                           |
| H                     | -0.60208500 | -1.15222600 | 0.53246600  |                                                           |
| C                     | -3.96160900 | -0.66387300 | 0.75115000  |                                                           |
| H                     | -5.03214900 | 0.99451900  | -0.11420800 |                                                           |
| H                     | -2.64914900 | -2.21301100 | 1.46239500  |                                                           |
| C                     | 2.93955400  | -0.05482200 | -0.47181800 |                                                           |
| C                     | 2.66851600  | -1.34896000 | -0.03099600 |                                                           |
| C                     | 4.27042800  | 0.32904800  | -0.64455500 |                                                           |
| C                     | 3.70188000  | -2.24353400 | 0.23110000  |                                                           |
| H                     | 1.64234500  | -1.66787500 | 0.11003000  |                                                           |
| C                     | 5.31209800  | -0.54959700 | -0.37664100 |                                                           |
| H                     | 4.49570900  | 1.33160500  | -0.99470100 |                                                           |
| C                     | 5.02301500  | -1.83968600 | 0.06071700  |                                                           |
| H                     | 3.48966200  | -3.25293900 | 0.56796400  |                                                           |
| C                     | 1.43128900  | 1.08305600  | 1.81695300  |                                                           |
| H                     | 0.73112600  | 0.24462500  | 1.77117600  |                                                           |
| H                     | 2.41756400  | 0.68703200  | 2.06692700  |                                                           |
| H                     | 1.11944100  | 1.74197500  | 2.62878900  |                                                           |
| C                     | -0.78544100 | 2.89164400  | 1.14193400  |                                                           |

|                              |             |             |             |                                                           |
|------------------------------|-------------|-------------|-------------|-----------------------------------------------------------|
| H                            | -0.26812800 | 3.67004500  | 1.70996500  |                                                           |
| H                            | -1.69593100 | 3.31917600  | 0.71706700  |                                                           |
| H                            | -1.06466800 | 2.08906800  | 1.82595200  |                                                           |
| O                            | 0.35005200  | 3.46830100  | -0.90113800 |                                                           |
| H                            | 0.74838200  | 4.19957000  | -0.41225900 |                                                           |
| O                            | -5.05139000 | -1.21416300 | 1.27931300  |                                                           |
| H                            | -5.58301800 | -1.77694200 | 0.48196200  |                                                           |
| O                            | 6.08080000  | -2.68037500 | 0.30444500  |                                                           |
| H                            | 5.75303100  | -3.54129100 | 0.59367000  |                                                           |
| H                            | 6.34534700  | -0.25180200 | -0.51155600 |                                                           |
| H                            | -5.03047800 | -1.30033800 | -1.88438400 |                                                           |
| O                            | -5.90098500 | -2.35771000 | -0.60660200 |                                                           |
| O                            | -4.82386400 | -2.11747200 | -1.39681800 |                                                           |
| <b>Name</b>                  |             |             |             | <b>3-O15-H-OOH-G</b>                                      |
| <b>Cartesian Coordinates</b> |             |             |             | <b>Frequency and Energy</b>                               |
| C                            | -0.79409900 | 2.01054500  | 0.13503400  | Zero-point correction= 0.361387 (Hartree/Particle)        |
| C                            | 0.62560000  | 1.61044900  | 0.59582200  | Thermal correction to Energy= 0.384139                    |
| C                            | 1.13237900  | 0.92106000  | -0.68958500 | Thermal correction to Enthalpy= 0.385083                  |
| C                            | -1.15749400 | 0.88779000  | -0.89978100 | Thermal correction to Gibbs Free Energy= 0.306852         |
| H                            | 1.20575100  | 2.51547900  | 0.80045300  | Sum of electronic and zero-point Energies= -1149.239560   |
| H                            | 1.33022200  | 1.69581000  | -1.44341700 | Sum of electronic and thermal Energies= -1149.216808      |
| H                            | -1.41181000 | 1.41294400  | -1.82748100 | Sum of electronic and thermal Enthalpies= -1149.215864    |
| O                            | 0.03033900  | 0.13148600  | -1.09682300 | Sum of electronic and thermal Free Energies= -1149.294095 |
| C                            | -2.29330700 | -0.02875100 | -0.52486900 |                                                           |
| C                            | -3.60516300 | 0.37819400  | -0.75465700 |                                                           |
| C                            | -2.07749000 | -1.26957800 | 0.07370500  |                                                           |
| C                            | -4.68062500 | -0.41402700 | -0.37077500 |                                                           |
| H                            | -3.79302500 | 1.32902000  | -1.24405000 |                                                           |
| C                            | -3.14147500 | -2.07428600 | 0.45594100  |                                                           |
| H                            | -1.06184200 | -1.61449800 | 0.22367800  |                                                           |
| C                            | -4.44739800 | -1.64306500 | 0.24069900  |                                                           |
| H                            | -5.69757900 | -0.08338400 | -0.55754200 |                                                           |
| H                            | -2.98115900 | -3.04178700 | 0.91537600  |                                                           |
| C                            | 2.35631900  | 0.07134100  | -0.51479800 |                                                           |
| C                            | 2.28154700  | -1.32806100 | -0.50736000 |                                                           |
| C                            | 3.59109600  | 0.69744800  | -0.30718900 |                                                           |
| C                            | 3.41396100  | -2.08691900 | -0.28831800 |                                                           |
| H                            | 1.32450500  | -1.80026100 | -0.68944100 |                                                           |
| C                            | 4.72885900  | -0.04681100 | -0.06866200 |                                                           |
| H                            | 3.65099000  | 1.78097700  | -0.33240800 |                                                           |
| C                            | 4.65746100  | -1.46199900 | -0.04191800 |                                                           |
| H                            | 3.38157000  | -3.16980300 | -0.27828400 |                                                           |
| C                            | 0.65876400  | 0.68695800  | 1.81051700  |                                                           |
| H                            | 0.08527200  | -0.22528300 | 1.62993900  |                                                           |
| H                            | 1.68512700  | 0.39826000  | 2.04461500  |                                                           |
| H                            | 0.23923200  | 1.18152900  | 2.68786800  |                                                           |
| C                            | -1.79778300 | 2.21392400  | 1.25829600  |                                                           |
| H                            | -1.42887800 | 2.97386800  | 1.95495400  |                                                           |
| H                            | -2.74916200 | 2.55378400  | 0.84557800  |                                                           |
| H                            | -1.97714800 | 1.29302900  | 1.81384700  |                                                           |
| O                            | -0.71027500 | 3.19923900  | -0.65766600 |                                                           |
| H                            | -0.52621200 | 3.94132000  | -0.07404800 |                                                           |
| O                            | -5.45473400 | -2.46986200 | 0.63690700  |                                                           |
| H                            | -6.30418400 | -2.07493500 | 0.42367800  |                                                           |

|                       |             |             |             |                                                           |
|-----------------------|-------------|-------------|-------------|-----------------------------------------------------------|
| O                     | 5.71367200  | -2.19243800 | 0.22721300  |                                                           |
| H                     | 6.53175200  | -2.01007000 | -0.53204900 |                                                           |
| H                     | 5.69081600  | 0.42270800  | 0.09658400  |                                                           |
| H                     | 5.94626500  | -1.36598900 | -2.92734200 |                                                           |
| O                     | 7.15054600  | -1.82289200 | -1.58627400 |                                                           |
| O                     | 6.40155000  | -0.87824900 | -2.22495200 |                                                           |
| <b>Name</b>           |             |             |             | <b>3-O15-H-OOH-P</b>                                      |
| Cartesian Coordinates |             |             |             | Frequency and Energy                                      |
| C                     | -0.78218600 | 2.07220300  | 0.16417000  | Zero-point correction= 0.360557 (Hartree/Particle)        |
| C                     | 0.63434100  | 1.69924900  | 0.65724300  | Thermal correction to Energy= 0.383304                    |
| C                     | 1.19741900  | 1.05878000  | -0.62953900 | Thermal correction to Enthalpy= 0.384248                  |
| C                     | -1.09158800 | 0.96249300  | -0.89899200 | Thermal correction to Gibbs Free Energy= 0.305603         |
| H                     | 1.18226000  | 2.61429200  | 0.89949500  | Sum of electronic and zero-point Energies= -1149.273413   |
| H                     | 1.40941300  | 1.85832400  | -1.35206300 | Sum of electronic and thermal Energies= -1149.250667      |
| H                     | -1.36005800 | 1.49536500  | -1.81814100 | Sum of electronic and thermal Enthalpies= -1149.249723    |
| O                     | 0.12898700  | 0.25672900  | -1.10379300 | Sum of electronic and thermal Free Energies= -1149.328368 |
| C                     | -2.19524000 | -0.00863900 | -0.56228800 |                                                           |
| C                     | -3.51984100 | 0.35414100  | -0.80190000 |                                                           |
| C                     | -1.94116900 | -1.25633800 | 0.00665300  |                                                           |
| C                     | -4.57041600 | -0.48868000 | -0.45840500 |                                                           |
| H                     | -3.73817200 | 1.31086800  | -1.26679100 |                                                           |
| C                     | -2.98040600 | -2.11292500 | 0.34789400  |                                                           |
| H                     | -0.91707900 | -1.56839600 | 0.17191800  |                                                           |
| C                     | -4.29871800 | -1.72589200 | 0.12195100  |                                                           |
| H                     | -5.59725500 | -0.19278700 | -0.65001300 |                                                           |
| H                     | -2.78401700 | -3.08501600 | 0.78495400  |                                                           |
| C                     | 2.43424600  | 0.23236600  | -0.43898100 |                                                           |
| C                     | 2.39156900  | -1.16639700 | -0.43316700 |                                                           |
| C                     | 3.65462100  | 0.88877800  | -0.21414000 |                                                           |
| C                     | 3.54103000  | -1.89833400 | -0.19562500 |                                                           |
| H                     | 1.44934900  | -1.66755000 | -0.61687000 |                                                           |
| C                     | 4.80941700  | 0.17219600  | 0.01704400  |                                                           |
| H                     | 3.68510300  | 1.97382700  | -0.23174800 |                                                           |
| C                     | 4.77104900  | -1.24161600 | 0.04018400  |                                                           |
| H                     | 3.52342300  | -2.98328200 | -0.17702900 |                                                           |
| C                     | 0.65871200  | 0.75183700  | 1.85269400  |                                                           |
| H                     | 0.12490100  | -0.17831800 | 1.64213900  |                                                           |
| H                     | 1.68702400  | 0.49782500  | 2.11966000  |                                                           |
| H                     | 0.19496200  | 1.21686300  | 2.72438100  |                                                           |
| C                     | -1.81940500 | 2.23631700  | 1.26171700  |                                                           |
| H                     | -1.48852900 | 3.00030800  | 1.97265800  |                                                           |
| H                     | -2.76920200 | 2.55697500  | 0.82866100  |                                                           |
| H                     | -1.98783000 | 1.30697600  | 1.80717200  |                                                           |
| O                     | -0.70224800 | 3.28005900  | -0.60329000 |                                                           |
| H                     | -0.52433300 | 4.00693600  | 0.00429900  |                                                           |
| O                     | -5.28214100 | -2.59834000 | 0.47471100  |                                                           |
| H                     | -6.14351300 | -2.22060900 | 0.26410200  |                                                           |
| O                     | 5.86458400  | -1.93451700 | 0.29025900  |                                                           |
| H                     | 6.25142400  | -2.35255100 | -0.67591900 |                                                           |
| H                     | 5.76021900  | 0.66501500  | 0.18365700  |                                                           |
| H                     | 4.79098900  | -2.22321100 | -2.66148800 |                                                           |
| O                     | 6.44472600  | -2.61845800 | -1.88782700 |                                                           |
| O                     | 5.62633000  | -1.74265400 | -2.52859300 |                                                           |
| <b>Name</b>           |             |             |             | <b>3-O15-H-OOH-W</b>                                      |

| Cartesian Coordinates |             |             |             | Frequency and Energy                         |                             |
|-----------------------|-------------|-------------|-------------|----------------------------------------------|-----------------------------|
| C                     | -1.68669700 | 2.10475600  | -0.06067700 | Zero-point correction=                       | 0.360427 (Hartree/Particle) |
| C                     | -0.28490600 | 2.01091900  | 0.58048500  | Thermal correction to Energy=                | 0.382077                    |
| C                     | 0.48321600  | 1.31028000  | -0.55970000 | Thermal correction to Enthalpy=              | 0.383021                    |
| C                     | -1.74726100 | 0.84333300  | -0.98423000 | Thermal correction to Gibbs Free Energy=     | 0.308991                    |
| H                     | 0.10412700  | 3.02063500  | 0.73361500  | Sum of electronic and zero-point Energies=   | -1149.279946                |
| H                     | 0.66536100  | 2.03759600  | -1.36041400 | Sum of electronic and thermal Energies=      | -1149.258296                |
| H                     | -2.01533700 | 1.20554500  | -1.98248000 | Sum of electronic and thermal Enthalpies=    | -1149.257352                |
| O                     | -0.42078500 | 0.31285900  | -1.02089900 | Sum of electronic and thermal Free Energies= | -1149.331382                |
| C                     | -2.72195000 | -0.23749400 | -0.58863200 |                                              |                             |
| C                     | -4.05878100 | -0.11572000 | -0.96925300 |                                              |                             |
| C                     | -2.34240700 | -1.34584200 | 0.16798300  |                                              |                             |
| C                     | -5.00554600 | -1.05737600 | -0.58366900 |                                              |                             |
| H                     | -4.36698400 | 0.72990300  | -1.57628800 |                                              |                             |
| C                     | -3.27652800 | -2.30057700 | 0.55413900  |                                              |                             |
| H                     | -1.30533100 | -1.47438800 | 0.45386400  |                                              |                             |
| C                     | -4.60949100 | -2.14960300 | 0.18464000  |                                              |                             |
| H                     | -6.04430400 | -0.95665600 | -0.88014400 |                                              |                             |
| H                     | -2.98256200 | -3.16431400 | 1.13920900  |                                              |                             |
| C                     | 1.78868000  | 0.69584400  | -0.15443200 |                                              |                             |
| C                     | 1.90452700  | -0.66676300 | 0.14282500  |                                              |                             |
| C                     | 2.90664800  | 1.53548000  | -0.01442800 |                                              |                             |
| C                     | 3.10961500  | -1.18378900 | 0.58115100  |                                              |                             |
| H                     | 1.04448200  | -1.31553800 | 0.03312200  |                                              |                             |
| C                     | 4.11668900  | 1.03267700  | 0.41246400  |                                              |                             |
| H                     | 2.81046300  | 2.58961200  | -0.25310400 |                                              |                             |
| C                     | 4.23293000  | -0.33923500 | 0.72870700  |                                              |                             |
| H                     | 3.21798500  | -2.23617400 | 0.82004100  |                                              |                             |
| C                     | -0.24454200 | 1.23830000  | 1.89481100  |                                              |                             |
| H                     | -0.62176800 | 0.21913700  | 1.77818800  |                                              |                             |
| H                     | 0.77895300  | 1.18124600  | 2.27171300  |                                              |                             |
| H                     | -0.85001800 | 1.74004800  | 2.65111200  |                                              |                             |
| C                     | -2.83305300 | 2.24824900  | 0.92391400  |                                              |                             |
| H                     | -2.68027200 | 3.14582000  | 1.53009500  |                                              |                             |
| H                     | -3.77551300 | 2.34983100  | 0.38161200  |                                              |                             |
| H                     | -2.90785900 | 1.38631900  | 1.58785900  |                                              |                             |
| O                     | -1.70278800 | 3.21837100  | -0.96843500 |                                              |                             |
| H                     | -1.63278800 | 4.02472300  | -0.44205200 |                                              |                             |
| O                     | -5.49703200 | -3.11304100 | 0.59441300  |                                              |                             |
| H                     | -6.38294400 | -2.89212700 | 0.28104700  |                                              |                             |
| O                     | 5.38601300  | -0.82171200 | 1.18070700  |                                              |                             |
| H                     | 5.84331400  | -1.45410600 | 0.39302600  |                                              |                             |
| H                     | 4.98834700  | 1.66725100  | 0.52105700  |                                              |                             |
| H                     | 4.49426600  | -2.15983100 | -1.55534100 |                                              |                             |
| O                     | 6.16232300  | -2.00138300 | -0.71776200 |                                              |                             |
| O                     | 5.22621100  | -1.51824000 | -1.57581500 |                                              |                             |
| <b>Name</b>           |             |             |             | <b>4-C2-H-OOH-G</b>                          |                             |
| Cartesian Coordinates |             |             |             | Frequency and Energy                         |                             |
| C                     | 0.57017500  | 1.65724600  | -0.14641400 | Zero-point correction=                       | 0.366893 (Hartree/Particle) |
| C                     | -0.84782900 | 1.89097400  | 0.43243000  | Thermal correction to Energy=                | 0.391255                    |
| C                     | -1.15572700 | 0.54330200  | 1.10721400  | Thermal correction to Enthalpy=              | 0.392199                    |
| C                     | 1.13219200  | 0.71720200  | 0.93938100  | Thermal correction to Gibbs Free Energy=     | 0.311155                    |
| H                     | -0.72495700 | 2.65856500  | 1.20708200  | Sum of electronic and zero-point Energies=   | -1224.451633                |
| H                     | -1.43173100 | 0.81638600  | 2.30972200  | Sum of electronic and thermal Energies=      | -1224.427270                |

|                              |             |             |             |                                              |                             |
|------------------------------|-------------|-------------|-------------|----------------------------------------------|-----------------------------|
| H                            | 1.32077200  | 1.33337500  | 1.82966500  | Sum of electronic and thermal Enthalpies=    | -1224.426326                |
| O                            | 0.04411400  | -0.16850300 | 1.19535200  | Sum of electronic and thermal Free Energies= | -1224.507371                |
| C                            | 2.36923000  | -0.05272700 | 0.57664000  |                                              |                             |
| C                            | 2.34599500  | -1.42206800 | 0.34041500  |                                              |                             |
| C                            | 3.57622500  | 0.63804600  | 0.43549600  |                                              |                             |
| C                            | 3.50571300  | -2.09656200 | -0.03333600 |                                              |                             |
| H                            | 1.41868700  | -1.96859100 | 0.45866800  |                                              |                             |
| C                            | 4.73315500  | -0.02311800 | 0.05705500  |                                              |                             |
| H                            | 3.59806000  | 1.70809800  | 0.61099200  |                                              |                             |
| C                            | 4.69834400  | -1.39675700 | -0.17791800 |                                              |                             |
| H                            | 3.48017200  | -3.16766700 | -0.20869100 |                                              |                             |
| H                            | 5.67286700  | 0.50262500  | -0.05746000 |                                              |                             |
| C                            | -2.27853500 | -0.31032600 | 0.63546800  |                                              |                             |
| C                            | -2.05101600 | -1.50405600 | -0.04812100 |                                              |                             |
| C                            | -3.60017100 | 0.07572900  | 0.88919800  |                                              |                             |
| C                            | -3.11443300 | -2.27635700 | -0.50008500 |                                              |                             |
| H                            | -1.03259000 | -1.82670500 | -0.22632100 |                                              |                             |
| C                            | -4.66562500 | -0.68371200 | 0.44037500  |                                              |                             |
| H                            | -3.79103900 | 0.97042900  | 1.47319600  |                                              |                             |
| C                            | -4.42229800 | -1.86401600 | -0.26196600 |                                              |                             |
| H                            | -2.92695400 | -3.20170300 | -1.03586600 |                                              |                             |
| C                            | -1.85837400 | 2.39031000  | -0.58814900 |                                              |                             |
| H                            | -2.82827000 | 2.59190800  | -0.12479800 |                                              |                             |
| H                            | -2.02177500 | 1.64661700  | -1.36927600 |                                              |                             |
| C                            | 0.55512100  | 1.00228300  | -1.52207100 |                                              |                             |
| H                            | 0.11062100  | 1.67803900  | -2.25609500 |                                              |                             |
| H                            | 1.57749600  | 0.77597800  | -1.82751900 |                                              |                             |
| H                            | -0.02158900 | 0.07309300  | -1.50979600 |                                              |                             |
| O                            | 1.34754400  | 2.83515800  | -0.15454100 |                                              |                             |
| H                            | 0.95010100  | 3.42545300  | -0.80495800 |                                              |                             |
| O                            | 5.86542700  | -1.99830400 | -0.54202800 |                                              |                             |
| H                            | 5.72056900  | -2.93955300 | -0.66887900 |                                              |                             |
| O                            | -5.50416200 | -2.57400300 | -0.67926100 |                                              |                             |
| H                            | -5.21827700 | -3.37434400 | -1.12774700 |                                              |                             |
| H                            | -5.69031000 | -0.39575800 | 0.63857200  |                                              |                             |
| O                            | -1.35303000 | 3.55911600  | -1.23294800 |                                              |                             |
| H                            | -1.53919800 | 4.32237600  | -0.68031900 |                                              |                             |
| H                            | -0.35940400 | -0.75640200 | 3.71354200  |                                              |                             |
| O                            | -1.37332900 | 0.80049900  | 3.57501000  |                                              |                             |
| O                            | -1.29517600 | -0.54541600 | 3.84502700  |                                              |                             |
| <b>Name</b>                  |             |             |             | <b>4-C5-H-OOH-G</b>                          |                             |
| <b>Cartesian Coordinates</b> |             |             |             | <b>Frequency and Energy</b>                  |                             |
| C                            | 0.53825700  | 1.65636700  | -0.19282000 | Zero-point correction=                       | 0.367337 (Hartree/Particle) |
| C                            | -0.80880400 | 1.90573500  | 0.52393200  | Thermal correction to Energy=                | 0.391565                    |
| C                            | -1.09579000 | 0.57278400  | 1.26441400  | Thermal correction to Enthalpy=              | 0.392509                    |
| C                            | 1.17358900  | 0.67325500  | 0.79443700  | Thermal correction to Gibbs Free Energy=     | 0.312419                    |
| H                            | -0.59094100 | 2.66471500  | 1.28306600  | Sum of electronic and zero-point Energies=   | -1224.450322                |
| H                            | -1.33583600 | 0.79612200  | 2.30976800  | Sum of electronic and thermal Energies=      | -1224.426094                |
| H                            | 1.44886900  | 1.38863000  | 1.81155900  | Sum of electronic and thermal Enthalpies=    | -1224.425150                |
| O                            | 0.14294000  | -0.15095900 | 1.24182000  | Sum of electronic and thermal Free Energies= | -1224.505240                |
| C                            | 2.40305400  | -0.07385500 | 0.46831400  |                                              |                             |
| C                            | 2.51436700  | -1.43855800 | 0.73808300  |                                              |                             |
| C                            | 3.50245900  | 0.60040200  | -0.08416100 |                                              |                             |
| C                            | 3.68731700  | -2.12344200 | 0.44558800  |                                              |                             |

|                       |             |             |             |                                                           |
|-----------------------|-------------|-------------|-------------|-----------------------------------------------------------|
| H                     | 1.67543300  | -1.96355800 | 1.17708600  |                                                           |
| C                     | 4.67043300  | -0.07775300 | -0.37983600 |                                                           |
| H                     | 3.42692900  | 1.66454700  | -0.27543300 |                                                           |
| C                     | 4.76522600  | -1.44447100 | -0.11453300 |                                                           |
| H                     | 3.76561700  | -3.18544700 | 0.65662400  |                                                           |
| H                     | 5.52552400  | 0.43045500  | -0.80763400 |                                                           |
| C                     | -2.19691900 | -0.29250600 | 0.69514800  |                                                           |
| C                     | -1.93274100 | -1.38622200 | -0.12258200 |                                                           |
| C                     | -3.52809500 | 0.01222400  | 0.99030500  |                                                           |
| C                     | -2.97150900 | -2.14044300 | -0.66026400 |                                                           |
| H                     | -0.90512300 | -1.66330800 | -0.32506000 |                                                           |
| C                     | -4.57190100 | -0.72606700 | 0.45648600  |                                                           |
| H                     | -3.75378500 | 0.83813100  | 1.65854400  |                                                           |
| C                     | -4.29200900 | -1.80557300 | -0.37945400 |                                                           |
| H                     | -2.75166200 | -2.99466600 | -1.29311300 |                                                           |
| C                     | -1.89884900 | 2.43572000  | -0.39284700 |                                                           |
| H                     | -2.82336900 | 2.63404000  | 0.15816200  |                                                           |
| H                     | -2.13983000 | 1.71669400  | -1.17700400 |                                                           |
| C                     | 0.39636200  | 1.04384000  | -1.58534800 |                                                           |
| H                     | -0.08319600 | 1.75712000  | -2.26015900 |                                                           |
| H                     | 1.38584000  | 0.80273600  | -1.97550800 |                                                           |
| H                     | -0.20475900 | 0.13270300  | -1.55934400 |                                                           |
| O                     | 1.32547300  | 2.82956500  | -0.25229700 |                                                           |
| H                     | 0.85216900  | 3.44620400  | -0.82295000 |                                                           |
| O                     | 5.93875300  | -2.05948100 | -0.42359400 |                                                           |
| H                     | 5.89615500  | -2.98663500 | -0.17480600 |                                                           |
| O                     | -5.35085700 | -2.50101100 | -0.87672400 |                                                           |
| H                     | -5.03813200 | -3.22379100 | -1.42725700 |                                                           |
| H                     | -5.60492800 | -0.49357400 | 0.68287100  |                                                           |
| O                     | -1.44145600 | 3.61726200  | -1.05116800 |                                                           |
| H                     | -1.54471700 | 4.36257200  | -0.45372600 |                                                           |
| H                     | 0.79864600  | -0.02969000 | 3.60029800  |                                                           |
| O                     | 1.32878100  | 1.67568700  | 3.05649800  |                                                           |
| O                     | 1.62274400  | 0.47522900  | 3.66198000  |                                                           |
| <b>Name</b>           |             |             |             | <b>4-O9-H-OOH-G</b>                                       |
| Cartesian Coordinates |             |             |             | Frequency and Energy                                      |
| C                     | 0.57066400  | 1.58159900  | -0.03013700 | Zero-point correction= 0.367361 (Hartree/Particle)        |
| C                     | -0.82833900 | 1.83426500  | 0.57482700  | Thermal correction to Energy= 0.391078                    |
| C                     | -1.16501700 | 0.50863900  | 1.31884000  | Thermal correction to Enthalpy= 0.392022                  |
| C                     | 1.13084000  | 0.61631900  | 1.03858600  | Thermal correction to Gibbs Free Energy= 0.311504         |
| H                     | -0.68421200 | 2.62339100  | 1.31927800  | Sum of electronic and zero-point Energies= -1224.454750   |
| H                     | -1.43745700 | 0.74543800  | 2.35402900  | Sum of electronic and thermal Energies= -1224.431033      |
| H                     | 1.38196700  | 1.23168300  | 1.91574300  | Sum of electronic and thermal Enthalpies= -1224.430088    |
| O                     | 0.04652300  | -0.24330300 | 1.32841300  | Sum of electronic and thermal Free Energies= -1224.510607 |
| C                     | 2.34037100  | -0.17155600 | 0.62831000  |                                                           |
| C                     | 2.28166100  | -1.55918400 | 0.44102500  |                                                           |
| C                     | 3.54222600  | 0.51102200  | 0.40159800  |                                                           |
| C                     | 3.40185700  | -2.25617500 | 0.03285700  |                                                           |
| H                     | 1.35041500  | -2.07534700 | 0.63691200  |                                                           |
| C                     | 4.66407300  | -0.17212500 | -0.02367900 |                                                           |
| H                     | 3.57468400  | 1.58522100  | 0.54570100  |                                                           |
| C                     | 4.61196100  | -1.57386400 | -0.22521900 |                                                           |
| H                     | 3.38376300  | -3.32925800 | -0.11543900 |                                                           |
| H                     | 5.60152800  | 0.33807600  | -0.20826700 |                                                           |

|                              |             |             |             |                                                           |
|------------------------------|-------------|-------------|-------------|-----------------------------------------------------------|
| C                            | -2.27896300 | -0.31856400 | 0.71979100  |                                                           |
| C                            | -2.02976900 | -1.40164900 | -0.11639100 |                                                           |
| C                            | -3.60679400 | 0.01867500  | 0.99290200  |                                                           |
| C                            | -3.07771600 | -2.11434100 | -0.69139600 |                                                           |
| H                            | -1.00667100 | -1.70166100 | -0.30552400 |                                                           |
| C                            | -4.66028200 | -0.67782000 | 0.42200200  |                                                           |
| H                            | -3.82218400 | 0.83760900  | 1.67315600  |                                                           |
| C                            | -4.39388900 | -1.74772300 | -0.43015100 |                                                           |
| H                            | -2.86915100 | -2.96120700 | -1.33789500 |                                                           |
| C                            | -1.85127900 | 2.33335300  | -0.42559200 |                                                           |
| H                            | -2.79966500 | 2.56298500  | 0.07160500  |                                                           |
| H                            | -2.04666400 | 1.57895800  | -1.19511100 |                                                           |
| C                            | 0.54084400  | 0.95254900  | -1.41846100 |                                                           |
| H                            | 0.08184200  | 1.64101800  | -2.13032400 |                                                           |
| H                            | 1.56068500  | 0.74664500  | -1.74634400 |                                                           |
| H                            | -0.02538900 | 0.01844500  | -1.41977700 |                                                           |
| O                            | 1.36315100  | 2.75219200  | -0.02980900 |                                                           |
| H                            | 0.87980000  | 3.41651900  | -0.53599000 |                                                           |
| O                            | 5.65641100  | -2.23904800 | -0.66256000 |                                                           |
| H                            | 6.51765100  | -2.15294600 | 0.06357300  |                                                           |
| O                            | -5.46159700 | -2.40206500 | -0.96445100 |                                                           |
| H                            | -5.15750400 | -3.13011100 | -1.51286900 |                                                           |
| H                            | -5.69086400 | -0.42124300 | 0.63332700  |                                                           |
| O                            | -1.28724100 | 3.51211600  | -1.00026500 |                                                           |
| H                            | -1.90200300 | 3.88754000  | -1.63439400 |                                                           |
| H                            | 6.05714400  | -1.81806700 | 2.54183200  |                                                           |
| O                            | 7.19575300  | -2.10111100 | 1.09924200  |                                                           |
| O                            | 6.48672100  | -1.24512200 | 1.88929900  |                                                           |
| <b>Name</b>                  |             |             |             | <b>4-O9-H-OOH-P</b>                                       |
| <b>Cartesian Coordinates</b> |             |             |             | <b>Frequency and Energy</b>                               |
| C                            | 0.57407500  | 1.69963400  | -0.10408800 | Zero-point correction= 0.366632 (Hartree/Particle)        |
| C                            | -0.82328700 | 1.91804800  | 0.51546100  | Thermal correction to Energy= 0.390255                    |
| C                            | -1.09113300 | 0.61308900  | 1.31866700  | Thermal correction to Enthalpy= 0.391200                  |
| C                            | 1.19739700  | 0.81625200  | 1.00219900  | Thermal correction to Gibbs Free Energy= 0.311874         |
| H                            | -0.70171100 | 2.73733200  | 1.23063600  | Sum of electronic and zero-point Energies= -1224.489482   |
| H                            | -1.36619400 | 0.88494300  | 2.34339300  | Sum of electronic and thermal Energies= -1224.465859      |
| H                            | 1.43691700  | 1.48190800  | 1.84432700  | Sum of electronic and thermal Enthalpies= -1224.464915    |
| O                            | 0.16050300  | -0.07905900 | 1.35191100  | Sum of electronic and thermal Free Energies= -1224.544240 |
| C                            | 2.43336000  | 0.06791900  | 0.60083500  |                                                           |
| C                            | 2.39988200  | -1.30058500 | 0.30934000  |                                                           |
| C                            | 3.63819800  | 0.77713900  | 0.46987600  |                                                           |
| C                            | 3.54323300  | -1.95038100 | -0.11795800 |                                                           |
| H                            | 1.46998600  | -1.84381700 | 0.42202900  |                                                           |
| C                            | 4.78841200  | 0.13856600  | 0.05678200  |                                                           |
| H                            | 3.65544700  | 1.83692700  | 0.69952500  |                                                           |
| C                            | 4.75913300  | -1.24015300 | -0.25666100 |                                                           |
| H                            | 3.53199300  | -3.00794500 | -0.36196100 |                                                           |
| H                            | 5.72815600  | 0.66924400  | -0.04146600 |                                                           |
| C                            | -2.16716500 | -0.29846900 | 0.77391200  |                                                           |
| C                            | -1.87627700 | -1.41107200 | -0.01025200 |                                                           |
| C                            | -3.50683300 | -0.01255900 | 1.05114500  |                                                           |
| C                            | -2.89441600 | -2.20809500 | -0.52685000 |                                                           |
| H                            | -0.84369300 | -1.67028200 | -0.20967100 |                                                           |
| C                            | -4.53189700 | -0.79262100 | 0.53672300  |                                                           |

|                       |             |             |             |                                                           |
|-----------------------|-------------|-------------|-------------|-----------------------------------------------------------|
| H                     | -3.75380700 | 0.83271500  | 1.68677100  |                                                           |
| C                     | -4.22375200 | -1.89412200 | -0.26035600 |                                                           |
| H                     | -2.65457800 | -3.07726600 | -1.13184900 |                                                           |
| C                     | -1.88234400 | 2.33709600  | -0.48326600 |                                                           |
| H                     | -2.83107100 | 2.54417000  | 0.02260500  |                                                           |
| H                     | -2.05722300 | 1.55344900  | -1.22778300 |                                                           |
| C                     | 0.54912700  | 1.00221300  | -1.45827100 |                                                           |
| H                     | 0.03999100  | 1.62884600  | -2.19339100 |                                                           |
| H                     | 1.57082000  | 0.83279400  | -1.80397800 |                                                           |
| H                     | 0.03132000  | 0.04160900  | -1.40514800 |                                                           |
| O                     | 1.31002700  | 2.90668500  | -0.18411700 |                                                           |
| H                     | 0.77359400  | 3.51557500  | -0.70817500 |                                                           |
| O                     | 5.84650900  | -1.84944800 | -0.68333500 |                                                           |
| H                     | 6.21530100  | -2.53156800 | 0.12880800  |                                                           |
| O                     | -5.26082800 | -2.63318100 | -0.73962400 |                                                           |
| H                     | -4.92245100 | -3.36894300 | -1.26245300 |                                                           |
| H                     | -5.57019800 | -0.57026200 | 0.75332300  |                                                           |
| O                     | -1.38140100 | 3.52177300  | -1.10682500 |                                                           |
| H                     | -2.00808600 | 3.81561700  | -1.77495200 |                                                           |
| H                     | 4.78255900  | -2.88262300 | 2.10119800  |                                                           |
| O                     | 6.41527500  | -3.11239000 | 1.22170600  |                                                           |
| O                     | 5.63701500  | -2.41793100 | 2.09405600  |                                                           |
| <b>Name</b>           |             |             |             | <b>4-O9-H-OOH-W</b>                                       |
| Cartesian Coordinates |             |             |             | Frequency and Energy                                      |
| C                     | 0.57581400  | 1.70552100  | -0.14419400 | Zero-point correction= 0.365799 (Hartree/Particle)        |
| C                     | -0.82813700 | 1.93114900  | 0.45535000  | Thermal correction to Energy= 0.389625                    |
| C                     | -1.08927700 | 0.65691300  | 1.30692300  | Thermal correction to Enthalpy= 0.390570                  |
| C                     | 1.20429400  | 0.86754900  | 0.99542600  | Thermal correction to Gibbs Free Energy= 0.311069         |
| H                     | -0.72529800 | 2.77646100  | 1.14190600  | Sum of electronic and zero-point Energies= -1224.499451   |
| H                     | -1.36723600 | 0.96744500  | 2.31825100  | Sum of electronic and thermal Energies= -1224.475624      |
| H                     | 1.43019100  | 1.56090800  | 1.81663700  | Sum of electronic and thermal Enthalpies= -1224.474680    |
| O                     | 0.17171400  | -0.02656600 | 1.37218400  | Sum of electronic and thermal Free Energies= -1224.554181 |
| C                     | 2.44848500  | 0.11982000  | 0.62224900  |                                                           |
| C                     | 2.40285200  | -1.21200700 | 0.19118900  |                                                           |
| C                     | 3.67681000  | 0.79958100  | 0.65384300  |                                                           |
| C                     | 3.55784900  | -1.85219600 | -0.21513200 |                                                           |
| H                     | 1.45661500  | -1.73834400 | 0.17363000  |                                                           |
| C                     | 4.83850800  | 0.17204900  | 0.25548100  |                                                           |
| H                     | 3.70735100  | 1.82512000  | 1.00504500  |                                                           |
| C                     | 4.79287500  | -1.16418000 | -0.19918000 |                                                           |
| H                     | 3.54279500  | -2.88176000 | -0.55572700 |                                                           |
| H                     | 5.79461500  | 0.68147500  | 0.27799800  |                                                           |
| C                     | -2.15820900 | -0.28097700 | 0.79570900  |                                                           |
| C                     | -1.87243400 | -1.39065500 | 0.00280900  |                                                           |
| C                     | -3.49296100 | -0.01243600 | 1.11063100  |                                                           |
| C                     | -2.89314700 | -2.20498600 | -0.48079200 |                                                           |
| H                     | -0.84518200 | -1.63775100 | -0.23584900 |                                                           |
| C                     | -4.52154200 | -0.80973800 | 0.62795300  |                                                           |
| H                     | -3.73128200 | 0.83534700  | 1.74554100  |                                                           |
| C                     | -4.21681800 | -1.90705300 | -0.17416200 |                                                           |
| H                     | -2.66645500 | -3.07116400 | -1.09384200 |                                                           |
| C                     | -1.89788000 | 2.28603100  | -0.55627000 |                                                           |
| H                     | -2.85427700 | 2.45921200  | -0.05332400 |                                                           |
| H                     | -2.03647100 | 1.48247200  | -1.28631000 |                                                           |



|                              |             |             |             |                                                           |
|------------------------------|-------------|-------------|-------------|-----------------------------------------------------------|
| C                            | 0.57244800  | 0.97733300  | -1.48034100 |                                                           |
| H                            | 0.05580400  | 1.57829000  | -2.23129700 |                                                           |
| H                            | 1.59857200  | 0.81497100  | -1.81633800 |                                                           |
| H                            | 0.06943000  | 0.01064700  | -1.40602800 |                                                           |
| O                            | 1.30738800  | 2.92018500  | -0.25316100 |                                                           |
| H                            | 0.81537000  | 3.48903800  | -0.86086600 |                                                           |
| O                            | 5.90096900  | -1.76107100 | -0.62384700 |                                                           |
| H                            | 6.22153700  | -2.50348500 | 0.14127500  |                                                           |
| O                            | -5.26072500 | -2.67310700 | -0.62911900 |                                                           |
| H                            | -4.91983200 | -3.39232100 | -1.17577200 |                                                           |
| H                            | -5.55619200 | -0.59855400 | 0.87163800  |                                                           |
| O                            | -1.45956200 | 3.48014400  | -1.20890500 |                                                           |
| H                            | -2.10364400 | 3.71006700  | -1.88724700 |                                                           |
| H                            | 4.65193100  | -3.17765600 | 1.90845900  |                                                           |
| O                            | 6.39339800  | -3.15628400 | 1.21755500  |                                                           |
| O                            | 5.44882800  | -2.63466900 | 2.04282600  |                                                           |
| <b>Name</b>                  |             |             |             | <b>4-O15-H-OOH-G</b>                                      |
| <b>Cartesian Coordinates</b> |             |             |             | <b>Frequency and Energy</b>                               |
| C                            | 0.57994700  | 1.66474400  | -0.12287200 | Zero-point correction= 0.367243 (Hartree/Particle)        |
| C                            | -0.80216500 | 1.96924400  | 0.50041500  | Thermal correction to Energy= 0.391003                    |
| C                            | -1.11809600 | 0.69331300  | 1.33913600  | Thermal correction to Enthalpy= 0.391948                  |
| C                            | 1.16796900  | 0.76610400  | 0.98532900  | Thermal correction to Gibbs Free Energy= 0.311836         |
| H                            | -0.63496100 | 2.80234600  | 1.18956400  | Sum of electronic and zero-point Energies= -1224.453919   |
| H                            | -1.36264600 | 0.99785800  | 2.36456400  | Sum of electronic and thermal Energies= -1224.430159      |
| H                            | 1.43853500  | 1.43110400  | 1.81863400  | Sum of electronic and thermal Enthalpies= -1224.429215    |
| O                            | 0.08118700  | -0.06649800 | 1.35756000  | Sum of electronic and thermal Free Energies= -1224.509327 |
| C                            | 2.35949500  | -0.06276000 | 0.59603100  |                                                           |
| C                            | 2.29103700  | -1.44629600 | 0.48672000  |                                                           |
| C                            | 3.56507500  | 0.58030800  | 0.30102200  |                                                           |
| C                            | 3.40346100  | -2.18150800 | 0.08409700  |                                                           |
| H                            | 1.36651400  | -1.95461900 | 0.73004800  |                                                           |
| C                            | 4.67500000  | -0.14205300 | -0.10584100 |                                                           |
| H                            | 3.62159900  | 1.66085300  | 0.37745700  |                                                           |
| C                            | 4.59402200  | -1.52940400 | -0.21500500 |                                                           |
| H                            | 3.34296200  | -3.26288900 | 0.00797100  |                                                           |
| H                            | 5.61265800  | 0.34642400  | -0.34007200 |                                                           |
| C                            | -2.25754800 | -0.15322800 | 0.82700700  |                                                           |
| C                            | -2.03728900 | -1.29878300 | 0.06035700  |                                                           |
| C                            | -3.57705900 | 0.23573200  | 1.11811200  |                                                           |
| C                            | -3.10400300 | -2.02234400 | -0.44485600 |                                                           |
| H                            | -1.02011700 | -1.61869400 | -0.12594000 |                                                           |
| C                            | -4.65019400 | -0.47851000 | 0.63327400  |                                                           |
| H                            | -3.74783400 | 1.10570700  | 1.74527200  |                                                           |
| C                            | -4.43380100 | -1.61654500 | -0.18069900 |                                                           |
| H                            | -2.94876400 | -2.90957400 | -1.04631200 |                                                           |
| C                            | -1.85082800 | 2.40852200  | -0.50235000 |                                                           |
| H                            | -2.78448900 | 2.67856100  | 0.00279700  |                                                           |
| H                            | -2.07056300 | 1.60622100  | -1.21544500 |                                                           |
| C                            | 0.50738200  | 0.95140500  | -1.46780600 |                                                           |
| H                            | 0.03335500  | 1.59604500  | -2.21040800 |                                                           |
| H                            | 1.51726800  | 0.71574600  | -1.80526900 |                                                           |
| H                            | -0.06179200 | 0.02169200  | -1.39522800 |                                                           |
| O                            | 1.37587800  | 2.82934800  | -0.21708000 |                                                           |
| H                            | 0.89075700  | 3.45644000  | -0.76668900 |                                                           |

|                              |             |             |             |                                                           |
|------------------------------|-------------|-------------|-------------|-----------------------------------------------------------|
| O                            | 5.71628300  | -2.19219700 | -0.61502800 |                                                           |
| H                            | 5.53968900  | -3.13584400 | -0.65118900 |                                                           |
| O                            | -5.45899900 | -2.26283200 | -0.68014900 |                                                           |
| H                            | -5.45737300 | -3.35224600 | -0.34941500 |                                                           |
| H                            | -5.67317500 | -0.19464400 | 0.84853500  |                                                           |
| O                            | -1.29776600 | 3.54189300  | -1.16861300 |                                                           |
| H                            | -1.92382200 | 3.87141100  | -1.81717800 |                                                           |
| H                            | -4.39588800 | -4.07256200 | 1.86508700  |                                                           |
| O                            | -5.37637100 | -4.37931800 | 0.31595100  |                                                           |
| O                            | -4.17018300 | -4.25344100 | 0.94053300  |                                                           |
| <b>Name</b>                  |             |             |             | <b>4-O15-H-OOH-P</b>                                      |
| <b>Cartesian Coordinates</b> |             |             |             | <b>Frequency and Energy</b>                               |
| C                            | 0.57332200  | 1.65243800  | -0.13432000 | Zero-point correction= 0.366254 (Hartree/Particle)        |
| C                            | -0.80584300 | 1.95748300  | 0.49240200  | Thermal correction to Energy= 0.390108                    |
| C                            | -1.12216000 | 0.67960400  | 1.32557200  | Thermal correction to Enthalpy= 0.391052                  |
| C                            | 1.16973100  | 0.76799100  | 0.98137500  | Thermal correction to Gibbs Free Energy= 0.310479         |
| H                            | -0.63712100 | 2.78123100  | 1.19216600  | Sum of electronic and zero-point Energies= -1224.489077   |
| H                            | -1.38331300 | 0.98323700  | 2.34597800  | Sum of electronic and thermal Energies= -1224.465223      |
| H                            | 1.43833300  | 1.43991200  | 1.80894500  | Sum of electronic and thermal Enthalpies= -1224.464279    |
| O                            | 0.08844900  | -0.07006800 | 1.36137600  | Sum of electronic and thermal Free Energies= -1224.544852 |
| C                            | 2.36705400  | -0.05595300 | 0.59945200  |                                                           |
| C                            | 2.26866400  | -1.41402800 | 0.31158400  |                                                           |
| C                            | 3.61087400  | 0.56817900  | 0.47674300  |                                                           |
| C                            | 3.38591300  | -2.13892500 | -0.09487500 |                                                           |
| H                            | 1.31356500  | -1.91482500 | 0.41430700  |                                                           |
| C                            | 4.72949600  | -0.14142900 | 0.06525800  |                                                           |
| H                            | 3.70073200  | 1.62610100  | 0.70004200  |                                                           |
| C                            | 4.61612000  | -1.50076300 | -0.22215900 |                                                           |
| H                            | 3.30131100  | -3.19991100 | -0.31044000 |                                                           |
| H                            | 5.69508900  | 0.34071700  | -0.03233700 |                                                           |
| C                            | -2.24707000 | -0.17939200 | 0.80250100  |                                                           |
| C                            | -2.01112800 | -1.33526400 | 0.05392500  |                                                           |
| C                            | -3.57222800 | 0.20803000  | 1.07144400  |                                                           |
| C                            | -3.06801100 | -2.07220700 | -0.45158500 |                                                           |
| H                            | -0.99207900 | -1.65546800 | -0.12184800 |                                                           |
| C                            | -4.63557200 | -0.51860400 | 0.58220200  |                                                           |
| H                            | -3.75571700 | 1.08728600  | 1.68121300  |                                                           |
| C                            | -4.40109000 | -1.66715200 | -0.20968200 |                                                           |
| H                            | -2.89758600 | -2.96676200 | -1.03952800 |                                                           |
| C                            | -1.85408700 | 2.41016400  | -0.50415600 |                                                           |
| H                            | -2.78509100 | 2.68062000  | 0.00494400  |                                                           |
| H                            | -2.07841600 | 1.62070400  | -1.22970500 |                                                           |
| C                            | 0.49768100  | 0.92897400  | -1.47253500 |                                                           |
| H                            | 0.01279500  | 1.56345700  | -2.21749200 |                                                           |
| H                            | 1.50680000  | 0.70068000  | -1.82024700 |                                                           |
| H                            | -0.06416700 | -0.00508300 | -1.39428400 |                                                           |
| O                            | 1.36270500  | 2.82293600  | -0.24993300 |                                                           |
| H                            | 0.85349200  | 3.44035200  | -0.79039600 |                                                           |
| O                            | 5.74269900  | -2.15614300 | -0.61646000 |                                                           |
| H                            | 5.53780200  | -3.08318500 | -0.78254800 |                                                           |
| O                            | -5.41758800 | -2.33130400 | -0.71907200 |                                                           |
| H                            | -5.45814300 | -3.36584600 | -0.29105300 |                                                           |
| H                            | -5.66098600 | -0.22952900 | 0.78140300  |                                                           |
| O                            | -1.29811300 | 3.55139900  | -1.15923000 |                                                           |

|                              |             |             |             |                                                           |
|------------------------------|-------------|-------------|-------------|-----------------------------------------------------------|
| H                            | -1.91489100 | 3.86226200  | -1.82897100 |                                                           |
| H                            | -4.56651800 | -3.81881300 | 2.04221200  |                                                           |
| O                            | -5.41344300 | -4.35948400 | 0.47170300  |                                                           |
| O                            | -4.26792100 | -4.14938700 | 1.17813800  |                                                           |
| <b>Name</b>                  |             |             |             | <b>4-O15-H-OOH-W</b>                                      |
| <b>Cartesian Coordinates</b> |             |             |             | <b>Frequency and Energy</b>                               |
| C                            | 0.57954400  | 1.60519500  | -0.15553300 | Zero-point correction= 0.366194 (Hartree/Particle)        |
| C                            | -0.81465700 | 1.86171700  | 0.45718100  | Thermal correction to Energy= 0.389807                    |
| C                            | -1.10420000 | 0.56411500  | 1.26981200  | Thermal correction to Enthalpy= 0.390751                  |
| C                            | 1.19094900  | 0.71843200  | 0.94999900  | Thermal correction to Gibbs Free Energy= 0.311926         |
| H                            | -0.68368800 | 2.67806400  | 1.17278100  | Sum of electronic and zero-point Energies= -1224.499204   |
| H                            | -1.37298500 | 0.84689100  | 2.29233200  | Sum of electronic and thermal Energies= -1224.475592      |
| H                            | 1.42243400  | 1.37983600  | 1.79544200  | Sum of electronic and thermal Enthalpies= -1224.474648    |
| O                            | 0.12771200  | -0.16088300 | 1.29964300  | Sum of electronic and thermal Free Energies= -1224.553473 |
| C                            | 2.42121400  | -0.05821500 | 0.57821500  |                                                           |
| C                            | 2.34852300  | -1.33489900 | 0.02126300  |                                                           |
| C                            | 3.67560900  | 0.53077300  | 0.74400300  |                                                           |
| C                            | 3.50135300  | -2.01142100 | -0.36172500 |                                                           |
| H                            | 1.38449000  | -1.81140200 | -0.11341600 |                                                           |
| C                            | 4.83480800  | -0.12916600 | 0.35499000  |                                                           |
| H                            | 3.74844900  | 1.51835300  | 1.18769300  |                                                           |
| C                            | 4.74348200  | -1.40346800 | -0.19781600 |                                                           |
| H                            | 3.44493000  | -3.00811000 | -0.78685300 |                                                           |
| H                            | 5.80924700  | 0.32706700  | 0.48433000  |                                                           |
| C                            | -2.20852900 | -0.30879300 | 0.72933200  |                                                           |
| C                            | -1.95229500 | -1.42755400 | -0.07509800 |                                                           |
| C                            | -3.53550500 | 0.02978600  | 1.03918600  |                                                           |
| C                            | -2.99511800 | -2.18089900 | -0.57917200 |                                                           |
| H                            | -0.93023700 | -1.70949300 | -0.29332800 |                                                           |
| C                            | -4.58738500 | -0.70435200 | 0.53259700  |                                                           |
| H                            | -3.72965000 | 0.87911000  | 1.68585600  |                                                           |
| C                            | -4.32967300 | -1.81938800 | -0.29793200 |                                                           |
| H                            | -2.81370000 | -3.05083700 | -1.19963600 |                                                           |
| C                            | -1.87733400 | 2.28326100  | -0.53725500 |                                                           |
| H                            | -2.82480700 | 2.47842700  | -0.02590300 |                                                           |
| H                            | -2.04741100 | 1.50595800  | -1.28937500 |                                                           |
| C                            | 0.54132200  | 0.92280800  | -1.51452000 |                                                           |
| H                            | 0.04811100  | 1.56884200  | -2.24373300 |                                                           |
| H                            | 1.55887800  | 0.72789900  | -1.85785400 |                                                           |
| H                            | -0.00067700 | -0.02471700 | -1.47070100 |                                                           |
| O                            | 1.34924600  | 2.79958700  | -0.23162700 |                                                           |
| H                            | 0.87955900  | 3.39842800  | -0.82755700 |                                                           |
| O                            | 5.91157300  | -2.02562800 | -0.56005400 |                                                           |
| H                            | 5.71567400  | -2.89733200 | -0.92626300 |                                                           |
| O                            | -5.33513500 | -2.51501900 | -0.82010900 |                                                           |
| H                            | -5.72993200 | -3.20512600 | -0.04136300 |                                                           |
| H                            | -5.61694500 | -0.45129400 | 0.75975800  |                                                           |
| O                            | -1.39831800 | 3.47795300  | -1.15784700 |                                                           |
| H                            | -2.03249200 | 3.74537400  | -1.83181400 |                                                           |
| H                            | -5.12670400 | -2.80539100 | 2.31517900  |                                                           |
| O                            | -5.89631900 | -3.90370700 | 1.00721900  |                                                           |
| O                            | -4.82906400 | -3.55655100 | 1.77170900  |                                                           |
